# Supplementary material for: Fecal microbiota transplantation via capsules relieves ulcerative colitis by improving gut microbiota and serum metabolites
Source: Research Square preprint supplement (doi:10.21203/rs.3.rs-1606914/v1), 2022-05-18
Supplement: Supplementary file 1 [file 07f38c29a3df7f230462ddb2.xlsx]

## Sheet: Table S2
Table S2. Relative abundance of the species that were significantly different uniquely between W0_Rm and W4_Rm （namely not between W0_NRm and W4_NRm）by paired wilcox test.
	s__Faecalibacterium.prausnitzii	s__Escherichia.coli	s__Bacteroides.xylanisolvens	s__Alistipes.shahii	s__Alistipes.sp..5CBH24	s__Paraprevotella.xylaniphila	s__Alistipes.sp..3BBH6	s__Odoribacter.splanchnicus	s__Alistipes.sp..5CPEGH6	s__Klebsiella.sp..PO552	s__Desulfovibrio.fairfieldensis	s__Methylobacterium.aquaticum	s__Salmonella.enterica	s__Eubacterium.limosum	s__Ethanoligenens.harbinense	s__Selenomonas.ruminantium	s__Caproiciproducens.sp..NJN.50	s__Enterobacter.hormaechei	s__Citrobacter.freundii.complex.sp..CFNIH3	s__Selenomonas.sputigena	s__Arabia.massiliensis	s__Eubacterium.callanderi	s__Agrobacterium.tumefaciens	s__Shigella.flexneri	s__Paraclostridium.bifermentans	s__Escherichia.sp..E4742	s__Streptococcus.suis	s__Klebsiella.michiganensis	s__Chryseobacterium.sp..17S1E7	s__Sorangium.cellulosum	s__Shigella.dysenteriae	s__Escherichia.marmotae	s__Maribacter.cobaltidurans	s__Rhodothermus.marinus	s__Denitrobacterium.detoxificans	s__Selenomonas.sp..oral.taxon.920	s__Azoarcus.communis	s__Dehalococcoides.mccartyi	s__Pelosinus.fermentans	s__Eggerthella.sp..YY7918	s__Paenibacillus.mucilaginosus	s__Desulfomicrobium.baculatum	s__Dokdonia.donghaensis	s__Desulfosporosinus.acidiphilus	s__Paenibacillus.riograndensis	s__Streptococcus.agalactiae	s__Thioflavicoccus.mobilis	s__Clostridium.formicaceticum	s__.Clostridium..cellulosi
F1W0	10.256	0.14592	0.255277	0.00451794	0.00235073	0.0261988	0.00161667	0.00401983	0.000961264	7.86488e-05	0.00020973	0.0128809	0.000611713	0.003111	0.000646668	0.00110108	0.000471893	0.000760272	3.4955e-05	0.0016691	0.00222838	0.00385379	0.000786488	5.24326e-05	0.00283136	0.000104865	0.00162541	2.62163e-05	4.36938e-05	0.000506848	0.000148559	0.000244685	4.36938e-05	3.4955e-05	0.000672885	0.00013982	0.000253424	0.000200991	8.73876e-05	0.0019837	0.00027964	2.62163e-05	0	2.62163e-05	0.00013982	0.000244685	1.74775e-05	8.73876e-05	0.00020973
F1W4	28.0278	0.0513133	2.0234	0.431	0.801594	0.725779	0.540499	0.133143	0.398426	0.000465346	0.0175042	0.010703	0.00467136	0.0427402	0.0376035	0.0171462	0.0321626	0.00186138	7.15917e-05	0.0320373	0.0310171	0.0094859	0.0103629	0.000107388	0.00365118	0.000143183	0.00800037	0.000161081	0.0102018	0.0108103	0.000357958	0.000214775	0.0107388	0.00846572	0.012618	0.00391965	0.0017361	0.00146763	0.00420601	0.00415232	0.00907425	0.00522619	0.00327532	0.00810776	0.00316793	0.000912794	0.00141394	0.0025594	0.00701599
F3W0	8.6222	9.04038	0.881946	1.74373	0.628583	0.160433	0.31999	0.209528	0.262129	0.0324374	0.0149037	0.847755	0.0412042	0.0105202	0.0105202	0.00789017	0.00876685	0.0797784	0.00350674	0.0122736	0.0157803	0.0131503	0.0157803	0.0061368	0.00438343	0.00964354	0	0.00701348	0.00350674	0.0061368	0.0061368	0.00701348	0.00175337	0.0061368	0.00263006	0.00263006	0.00175337	0.000876685	0.000876685	0.00175337	0.00263006	0.00701348	0.000876685	0.000876685	0.000876685	0.000876685	0.00438343	0.000876685	0.00175337
F3W4	7.55799	0.0358063	2.75964	0.105377	0.0275586	0.324021	0.100222	0.585392	0.0604504	0.000337047	0.00245846	0.0151275	0.00864427	0.0176851	0.0138586	0.0190531	0.0135612	0.00170506	0.000158611	0.00727626	0.0104088	0.0200841	0.0190134	0.000158611	0.00999246	9.91316e-05	0.0048971	0.000178437	0.0197074	0.00448075	0.000218089	0.000257742	0.0152663	0.00325152	0.00644355	0.0113407	0.00767278	0.00406439	0.00196281	0.00438162	0.00342995	0.00261707	0.00856497	0.000396526	0.00652286	0.000317221	0.0156628	0.00335065	0.003767
F4W0	0.467947	55.7612	0.0398939	0.0447834	0.0295592	0.00822325	0.00922337	0.00833437	0.0131127	5.19131	0.000111125	0.00777875	0.322596	0.000777875	0.000555625	0	0.000555625	0.0754538	0.220916	0.000555625	0.000333375	0.00066675	0.000777875	0.0314484	0.000111125	0.0445611	0.000555625	0.0461169	0.000111125	0.0004445	0.041783	0.0455612	0.00022225	0	0.000333375	0.000111125	0	0	0.000111125	0.000111125	0.00022225	0.000111125	0	0	0	0.000333375	0	0.000111125	0.00022225
F4W4	4.64809	0.253299	2.18166	3.01998	2.34929	0.450201	1.58264	1.72154	0.421601	0.0302274	0.0227151	0.00305395	0.0422649	0.0204414	0.0280205	0.0101427	0.0215114	0.0282435	0.0110343	0.0102764	0.0161168	0.0114133	0.011926	0.00109229	0.00169416	0.0360232	0.00717789	0.0121266	0.00985289	0.00775748	0.00191708	0.0107223	0.0127954	0.00782435	0.00820331	0.00374499	0.00407936	0.00198395	0.000936247	0.00566207	0.00613019	0.00858227	0.00365582	0.000356666	0.00202854	0.00365582	0.00227374	0.00312082	0.00528311
F10W0	22.3974	0.0171596	0.70801	0.117644	0.0244261	0.747353	0.00161051	0.623612	0.0497149	0.000172555	0.000440973	0.00310598	0.0153957	0.00661459	0.00287591	0.00837848	0.00239659	0.0067488	7.66909e-05	0.00212817	0.0105067	0.00308681	0.00452476	5.75182e-05	0.000134209	0.0002109	0.0125198	0.000440973	0.00509994	0.00111202	7.66909e-05	0.000862773	0.00203231	0.00699804	0.000977809	0.000613527	0.0029526	0.000728564	0.00417965	0.00103533	0.00162968	0.000153382	1.91727e-05	0.00178306	0.000191727	0.00385372	0.000115036	0.00287591	0.000881945
F10W4	58.5428	0.0252164	0.68239	0.084286	0.0178885	0.346045	0.0462899	0.0572337	0.0296546	8.78063e-05	0.00536416	0.00174814	0.00431049	0.0291756	0.0177209	0.0244022	0.0143044	0.0014049	3.19296e-05	0.0180961	0.0162122	0.046705	0.00513268	8.78063e-05	0.0513108	6.38591e-05	0.0101137	0.00019956	0.000638591	0.00561162	0.000135701	0.00118139	0.000359207	0.002267	0.00619433	0.00409497	0.0028577	0.00120534	0.0110077	0.00536416	0.00781476	0.0043983	7.98239e-05	0.0080223	0.00197165	0.00492513	0.000798239	0.00636196	0.00406304
F15W0	2.36221	0.315926	0.36395	0.0438579	0.0094318	0.197256	0.000130997	0.181405	0.0400459	0.000235795	0.0045587	0.00115278	0.0048731	0.0168593	0.00861962	0.00486	0.00508269	0.016152	9.16981e-05	0.00710005	0.0048993	0.0049386	0.00289504	0.000785984	0.00049779	0.000799083	0.00402162	0.000812183	0.00327493	0.00322253	0.00140167	0.00138857	0.00585558	0.000890781	0.00374652	0.00555428	0.0093925	0.000406092	0.00103488	0.000327493	0.0049386	0.00106108	0.00125757	0.00102178	0.00113968	0.00146717	0.00203046	0.00163747	0.00161127
F15W4	6.57848	0.125757	6.81441	7.95928	1.33452	0.426289	2.42783	0.200095	1.03746	0.000126389	0.0176313	0.00183264	0.00642477	0.0153563	0.00907894	0.0117331	0.00615093	0.00334931	8.42593e-05	0.00638264	0.00606667	0.0087419	0.0109326	0.000463426	0.000147454	0.000442361	0.00625625	0.00061088	0.00265417	0.00612986	0.000863658	0.000674074	0.010069	0.00794144	0.00259097	0.00543473	0.0124493	0.00240139	0.0012007	0.002275	0.00442361	0.00587709	0.00975301	0.000821528	0.00337037	0.0026963	0.00455	0.00349676	0.00105324
F16W0	5.34217	0.180061	2.24272	0.266692	1.68699	0.190464	0.0516803	0.0524308	0.243207	0.00334837	0.0200094	0.00316363	0.00966408	0.0504333	0.00775897	0.00279415	0.00660436	0.00375248	0.000300198	0.00357929	0.0034061	0.00535739	0.0051611	0.000635035	0.000508028	0.000577305	0.00409886	0.00631571	9.23687e-05	0.00315208	0.00079668	0.000461844	0.000184737	0.000923687	0.00227458	0.000842865	0.00279415	0.000219376	0.000254014	0.00130471	0.00121234	0.00623489	0.000127007	0.000427205	0.000785134	0.00173191	0.000542666	0.000127007	0.0019282
F16W4	11.1262	0.129707	1.27001	5.44736	3.92169	1.05275	1.55964	1.25908	2.15628	0.00108497	0.953806	0.00230225	0.0116832	0.0588396	0.0784352	0.0285267	0.0606523	0.00437956	0.000119082	0.0323638	0.0279975	0.0257217	0.0194236	0.000714491	0.00375769	0.00050279	0.0147926	0.00281827	0.0072243	0.0251395	0.00100558	0.00091296	0.00510729	0.00924869	0.0117626	0.0159702	0.00551746	0.0067612	0.00263303	0.0147397	0.0116568	0.0158114	0.00238164	0.00162745	0.00347983	0.0306702	0.00759477	0.00378415	0.0162877
F19W0	0.722363	5.35349	0.00202692	0.0020581	0.000623668	0.00215165	0.000545709	0.0024323	0.00073281	7.79585e-05	0.000795177	0.004506	0.172709	0.00723455	0.0119588	0.00453718	0.0219063	0.00233875	3.11834e-05	0.00397588	0.00767111	0.00271296	0.0122863	0.00988514	0.00495816	0.00759316	0.00286887	0.00310275	0.000343017	0.00215165	0.0119276	0.00681357	0	0.0022452	0.0050673	0.000233875	0.00555064	0.000997869	0.00311834	0.00424094	0.00218284	0.00109142	0	0.0001871	0.000514526	0.000280651	1.55917e-05	0.00063926	0.0046931
F19W4	0.153408	0.197986	3.85981	0.0554724	0.0243151	0.352011	0.00510969	0.843422	0.0550026	2.9366e-05	0.000792883	0.00352392	0.00234928	0.0029366	0.00132147	0.0567058	0.000557954	8.80981e-05	0	0.0411124	0.00590257	0.0162981	0.0177077	0.000205562	0.0115702	0.000205562	0.015241	8.80981e-05	0.0177371	0.00167386	0.000117464	0.00058732	0.0145949	0.0062256	0.00111591	0.0130972	0.0124218	0.0177371	0.0399084	0.000264294	0.00314216	0.000176196	0.012598	0.0371187	0.0357972	0.00560891	0.0120694	0.021261	0.00117464
F20W0	9.34066	24.6744	0.394545	0.036776	0.00144625	0.217203	0.00457486	0.38997	0.0170008	7.37881e-05	0.00177091	0.00360086	0.0201294	0.022771	0.00535702	0.00603587	0.00408786	0.00875127	8.85457e-05	0.00436826	0.00971052	0.00720172	0.00724599	0.0936814	0.000841185	0.0176354	0.00314337	0.000708366	0.00289249	0.00377795	0.0233908	0.0120717	0.00368941	0.00118061	0.00190373	0.00258258	0.00128391	0.0027154	0.00169713	0.0123079	0.00128391	0.000693608	1.47576e-05	0.00126916	0.000501759	0.00180043	0.000383698	0.00126916	0.000988761
F20W4	10.8605	7.0202	1.44425	0.0892284	0.00369042	0.329186	0.00492721	0.393219	0.0338122	5.98447e-05	0.00205467	0.00327151	0.0144625	0.028905	0.00803913	0.0181329	0.00638343	0.00390985	1.99482e-05	0.0168762	0.0138042	0.0044684	0.00610415	0.0185917	0.0306006	0.0062039	0.0104928	0.000678239	0.0127469	0.00624379	0.0072811	0.00462799	0.00789949	0.00462799	0.00578498	0.00452825	0.00295234	0.00456814	0.00371037	0.0109316	0.00199482	0.00163575	0.00600441	0.0045083	0.00101736	0.000598447	0.00101736	0.00811892	0.00213446
F21W0	13.4795	1.73336	1.47594	0.05253	0.0346175	0.777786	0.181104	0.385086	0.0865436	0.00717843	0.00218036	0.00493097	0.0206967	0.0161347	0.0415275	0.0136524	0.00442781	0.00264998	0.000536705	0.00234808	0.0114385	0.00982841	0.0115056	0.00134176	0.0102645	0.00345504	0.00855373	0.0199252	0.00922461	0.00194555	0.0016772	0.00187847	0.0031196	0.0102309	0.00171075	0.000536705	0.00261644	0.0175771	0.000872145	0.0011405	0.00174429	0.000637337	0.0136524	0.000905689	0.000503161	0.00204619	0.00888917	0.00288479	0.000872145
F21W4	13.0156	0.313346	1.34404	3.65691	0.730942	2.86478	2.34329	1.58577	0.732202	0.00281592	0.0136474	0.00374221	0.0121653	0.0156975	0.0468703	0.0158087	0.0366564	0.00410038	4.94022e-05	0.0241947	0.0299377	0.0108685	0.0191433	0.000963342	0.0100163	0.00154382	0.0100163	0.00813901	0.00385337	0.0109179	0.0011239	0.000815136	0.00172908	0.0144254	0.00976928	0.0045203	0.00295178	0.0153023	0.00103745	0.00664459	0.0101645	0.0105597	0.00813901	0.00156852	0.00401393	0.00290238	0.00285298	0.00163027	0.00974458
[truncated: 889 more columns]
