# Supplementary material for: Fecal microbiota transplantation via capsules relieves ulcerative colitis by improving gut microbiota and serum metabolites
Source: Research Square preprint supplement (doi:10.21203/rs.3.rs-1606914/v1), 2022-05-18
Supplement: Supplementary file 2 [file 6c68b91d04c7e5cad909299f.xlsx]

## Sheet: Table S7
Table S7 Relative abundances of metabolites that were significantly different between Rm and NRm at week 4 after FMT.
ID	POS158	POS121	POS123	POS326	POS364	POS351	POS65	POS68	POS440	POS350	POS212	POS349	POS222	POS373	POS131	POS211	POS232	POS392	POS403	POS119	POS526	POS22	POS428	POS160	POS510	POS363	POS194	POS104	POS279	POS18	NEG78	NEG186	NEG58	NEG25	NEG203	Group
Metabolite	(Z)-docos-13-enamide	Benzyl methyl sulfide	PC(22:2(13Z,16Z)/12:0)	Oleoyl Ethyl Amide	PC(9:0/0:0)	PC(22:2(13Z,16Z)/16:1(9Z))	L-Palmitoylcarnitine	2-Propylpiperidine	piperidine-4-carboxamide	AL 8810 methyl ester	alpha-Triticene	Obscuraminol A	(E)-2-(2-Octenyl)cyclopentanone	2,4,12-Octadecatrienoic acid isobutylamide	6,11-hexadecadienal	Vitamin A	Umbelliferone	3-Buten-2-one 1-(2,3,6-trimethyl phenyl)	3,4,5-Trimethoxycinnamic acid	C16 Sphingosine	N-Acetyl-L-leucine	Sarothranol	PC(20:5(5Z,8Z,11Z,14Z,17Z)/0:0)	18-fluoro-octadecanoic acid	C16 Sphinganine	xi-3-(4-Isopropylphenyl)-2-methylpropanal	Indolelactic acid	Octanoylcarnitine	9R,10S-Epoxy-3Z,6Z-eicosadiene	Cys Arg Ser	D-Glutamine	dodecyl hydrogen sulfate	Ricinoleic acid	2,4,5-trichloro-6-hydroxybenzene-1,3-dicarbonitrile	12,13-DiHOME
F1W4	1.37808	0.416801	0.357615	0.10984	0.127196	0.0603973	0.0295641	0.0322176	0.0400308	0.0317959	0.0284293	0.0263728	0.016799	0.00469465	0.010054	0.0104258	0.0127273	0.00700167	0.00392338	0.00536988	0.00110333	0.00130736	0.000353939	0.00122765	0.000576944	0.000158692	0.00108957	0.000704664	2.37293e-06	2.37293e-06	0.077708	0.011478	0.0354547	0.000711988	0.000614232	W4_Rm
F2W4	3.38947	0.400196	0.312002	0.273696	0.129744	0.0393574	0.0231082	0.0310906	0.0402144	0.0319572	0.0280019	0.0266523	0.0166808	0.0119158	0.0109917	0.0078306	0.00805345	0.00690777	0.00439265	0.0048125	0.00143113	0.0015791	8.81369e-05	0.00148326	0.000617478	0.000453739	0.000858246	0.000790148	0.000659063	2.41044e-06	0.101078	0.0221897	0.0328381	0.0024796	0.00045939	W4_NRm
F3W4	1.90283	0.447022	0.271309	0.111216	0.118798	0.0571397	0.0404167	0.0319516	0.0343848	0.0309176	0.025917	0.0268437	0.0164883	0.00905286	0.0109223	0.00813571	0.0130928	0.00642056	0.00378365	0.00519377	0.00227221	0.00133064	3.83025e-05	0.00084482	0.000805851	0.000351241	0.00271476	0.000733115	6.42069e-05	2.25694e-06	0.0985153	0.00852243	0.0296629	0.000969491	0.00081134	W4_Rm
F4W4	1.89388	0.540126	0.308031	0.128043	0.150316	0.0636782	0.0320453	0.037256	0.0441332	0.0383699	0.0466942	0.0315147	0.0200136	0.00717827	0.0127889	0.0144516	0.0214447	0.00779718	0.0094602	0.0066398	0.00901135	0.00500716	0.0038108	0.00123675	0.000764633	6.18826e-05	0.00261371	0.000906921	2.83585e-06	2.83585e-06	0.126813	0.00814865	0.0284076	0.000774943	0.000325156	W4_Rm
F7W4	2.26061	0.274355	0.22828	0.337907	0.105486	0.0434761	0.0411268	0.0321408	0.024746	0.0263745	0.022329	0.0248781	0.0171245	0.0172924	0.00980157	0.0109872	0.00821518	0.00676294	0.00390278	0.0057026	0.000638419	2.38856e-06	0.000107377	0.00105911	0.00145585	0.00242699	2.38856e-06	0.000618487	0.000642013	2.38856e-06	0.0770837	0.0073785	0.0235561	0.00684113	0.000656513	W4_NRm
F8W4	2.14755	0.274437	0.219408	0.209512	0.11764	0.042525	0.0560216	0.0299109	0.03654	0.0302667	0.0223491	0.0157143	0.0149598	0.00962721	0.0080273	0.00929135	0.00439469	0.00593868	0.00339751	0.0047645	0.000366662	0.00128209	1.88574e-05	0.0024199	0.0015766	0.000607356	2.35423e-06	0.000473174	0.000589204	2.35423e-06	0.0744613	0.0154452	0.0273758	0.00383795	0.00061714	W4_NRm
F9W4	2.81805	0.301685	0.198043	0.526362	0.102825	0.0414699	0.0424494	0.0314205	0.0241963	0.0258425	0.0229083	0.0246495	0.0160689	0.0208582	0.0103212	0.00759579	0.0095983	0.0064783	0.00327912	0.00562823	0.000698413	2.36845e-06	0.000100462	0.00156909	0.00141192	0.00234226	2.36845e-06	0.000646409	0.0015057	2.36845e-06	0.0808517	0.0164652	0.0292064	0.00499311	0.000636865	W4_NRm
F10W4	1.26158	0.445446	0.366928	0.103362	0.112469	0.0443574	0.0275987	0.0332573	0.0324206	0.0289847	0.0250916	0.02585	0.0171912	0.00503728	0.0108171	0.0118135	0.011338	0.00681689	0.00480767	0.00594454	0.00318241	0.000180338	0.000272069	0.000625463	0.00066795	0.000162251	0.00193945	0.000766275	2.41159e-06	1.1315e-05	0.10022	0.00651765	0.027498	0.00163528	0.00036836	W4_Rm
F22W4	2.92374	0.31312	0.306712	0.492121	0.111025	0.0610555	0.0755302	0.0336987	0.016015	0.027407	0.0252117	0.0267503	0.0181116	0.0177107	0.00961486	0.00972268	0.00626731	0.00713108	0.00763298	0.00591607	0.00198179	0.00298817	0.00295807	0.00127561	0.00179451	0.0018025	5.90596e-05	0.000568443	0.00161765	2.57782e-06	0.0701868	0.0114675	0.0278347	0.00140858	0.00075097	W4_NRm
F13W4	2.05083	0.29268	0.209033	0.33417	0.0967457	0.0395115	0.0680439	0.0300002	0.0110077	0.023446	0.0311742	0.0231402	0.0151175	0.0134665	0.0097007	0.0104028	0.00512511	0.00591994	0.00245648	0.00510948	0.000854907	0.00034967	0.000215161	0.00298546	0.004302	0.00169473	2.22494e-06	0.000565579	0.00100098	2.22494e-06	0.0840197	0.00904517	0.0254956	0.0043382	0.000742905	W4_NRm
F15W4	1.60338	0.213443	0.338931	0.122529	0.147288	0.0914423	0.0340228	0.0405696	0.0497827	0.0395109	0.046581	0.032392	0.0214185	0.00463659	0.0128813	0.0120121	0.00966835	0.00860518	0.00888641	0.00655336	0.00667079	0.00467571	0.00357567	0.000643847	0.000590289	0.000291379	0.0017159	0.000948099	2.92511e-06	7.9871e-05	0.0986199	0.0157464	0.0336942	0.000893369	0.000285515	W4_Rm
F16W4	3.34807	0.484544	0.318336	0.35423	0.148296	0.0820759	0.0444121	0.0401901	0.0466278	0.0383666	0.04742	0.0348368	0.0208729	0.0126262	0.0125947	0.0173596	0.00750021	0.0085855	0.00978391	0.00704578	0.00446701	0.00497116	0.00469795	0.0008538	0.00133014	0.000691438	1.79815e-05	0.000870643	0.000822923	1.25883e-05	0.111256	0.0052892	0.0275953	0.00101533	0.000358873	W4_Rm
F17W4	4.06527	0.405784	0.255128	0.454956	0.0692502	0.0713019	0.0566196	0.0365182	0.024365	0.0352765	0.0442856	0.0280974	0.0181497	0.0158047	0.0121201	0.0099147	0.00481531	0.00705919	0.00515048	0.0049114	0.00193891	0.0020807	0.00286656	0.0033937	0.0023531	0.00212795	2.68126e-06	0.000803677	0.00140959	2.68126e-06	0.107684	0.396584	0.0249259	0.00218198	0.000625592	W4_NRm
F18W4	3.1864	0.330168	0.307699	0.509954	0.127379	0.0465544	0.0749461	0.0370079	0.00655228	0.0313835	0.027866	0.0287675	0.0191486	0.0229623	0.0124783	0.00987416	0.00734691	0.00761176	0.00568311	0.00675537	0.0014434	0.00392829	0.00205065	0.00107486	0.00113216	0.00459065	2.99733e-06	0.000860253	0.00147188	2.99733e-06	0.0860992	0.100222	0.0240655	0.000661078	0.000555004	W4_NRm
F19W4	2.26007	0.587153	0.244046	0.287741	0.149227	0.0979088	0.029304	0.0385154	0.0468435	0.0385669	0.0338021	0.0326225	0.0202845	0.00924193	0.0134182	0.0180555	0.00607718	0.00797076	0.00742869	0.006332	0.00633589	0.00483945	0.00341062	0.000461565	0.000150758	0.00078315	0.000689272	0.000937588	0.000793044	2.77314e-06	0.102845	0.0054261	0.0269343	0.00119365	0.000293977	W4_Rm
F20W4	1.61691	0.365339	0.321943	0.137912	0.138115	0.086726	0.0258094	0.0385934	0.0448902	0.0367228	0.0302164	0.031985	0.021202	0.00628186	0.0131676	0.0102122	0.00885923	0.00887917	0.00750848	0.00755088	0.00758876	0.00373224	0.00394221	0.000831276	0.0012942	0.00067503	0.000821315	0.000777452	3.05107e-06	1.55031e-05	0.10397	0.00616326	0.0358867	0.00133013	0.000237649	W4_Rm
F21W4	3.24775	0.538177	0.21333	0.158881	0.152847	0.0494817	0.0352958	0.0389148	0.0474128	0.0395648	0.0342815	0.0336988	0.0210884	0.0108313	0.0133824	0.0107398	0.00878915	0.00830306	0.0114722	0.0065218	0.0086525	0.00446891	0.00313357	0.00113536	0.00117805	0.0001897	0.00197689	0.000994261	2.90186e-06	1.64706e-05	0.101449	0.011048	0.0296984	0.000844575	0.000364562	W4_Rm
