# Supplementary material for: Fecal microbiota transplantation via capsules relieves ulcerative colitis by improving gut microbiota and serum metabolites
Source: Research Square preprint supplement (doi:10.21203/rs.3.rs-1606914/v1), 2022-05-18
Supplement: Supplementary file 3 [file c454e14ed541fe68053854cf.xlsx]

## Sheet: Sheet1
Table S5. Relative abundance of the genes assocaited with module of lipopolysaccharide biosynthesis-KDO2-lipid A (M00060), and gene stratificaition by micobial species. Only genes were significantly differented between W0_Rm and W4_Rm were listed.
	F15W0	F15W1	F15W4	F15W12	F16W0	F16W1	F16W4	F16W12	F18W0	F18W1	F18W4	F19W0	F19W1	F19W4	F19W12	F20W0	F20W1	F20W4	F20W12	F21W0	F21W1	F21W4	F21W12	F7W4	F7W12	F4W4	F4W12	F9W4	F9W12	F11W0	F11W1	F11W4	F13W0	F13W1	F13W4	F13W12	F17W0	F17W1	F17W4	F17W12	F1W0	F1W1	F1W4	F1W12	F2W0	F2W1	F2W4	F2W12	F3W0
K00677	4.58278e-05	1.22465e-05	7.00294e-06	5.21007e-06	4.91802e-05	6.91586e-06	7.72871e-06	1.90999e-05	5.1894e-05	1.97538e-05	2.57379e-05	1.59681e-05	5.6616e-06	0	1.70491e-06	4.01232e-05	1.82495e-06	7.03478e-06	1.29018e-05	9.0734e-06	1.2284e-05	6.21958e-06	4.3616e-06	3.31553e-05	1.30671e-05	1.39576e-05	0.00012962	2.71067e-05	4.10864e-05	0.000105161	0	0	5.00497e-06	8.13532e-05	2.10248e-05	2.78581e-05	3.35601e-05	1.04516e-05	3.48741e-06	1.21334e-05	8.05738e-05	3.05879e-05	1.59651e-05	7.30111e-05	2.78513e-05	5.16212e-06	6.1038e-06	8.77878e-06	6.98488e-05
K00677|g__Aeromonas.s__Aeromonas_allosaccharophila	0	0	0	0	0	0	0	0	0	0	0	0	0	0	0	0	0	0	0	0	0	0	0	0	0	0	0	0	0	0	0	0	0	0	0	0	0	0	0	0	0	0	0	0	0	0	0	0	0
K00677|g__Aeromonas.s__Aeromonas_caviae	0	0	0	0	0	0	0	0	0	0	0	0	0	0	0	0	0	0	0	0	0	0	0	0	0	0	0	0	0	0	0	0	0	0	0	0	0	0	0	0	0	0	0	0	0	0	0	0	0
K00677|g__Aeromonas.s__Aeromonas_media	0	0	0	0	0	0	0	0	0	0	0	0	0	0	0	0	0	0	0	0	0	0	0	0	0	0	0	0	0	0	0	0	0	0	0	0	0	0	0	0	0	0	0	0	0	0	0	0	0
K00677|g__Aeromonas.s__Aeromonas_veronii	0	0	0	0	0	0	0	0	2.03491e-06	0	0	0	0	0	0	0	0	0	0	0	0	0	0	0	0	0	0	0	0	0	0	0	0	0	0	0	0	0	0	0	0	0	0	0	0	0	0	0	0
K00677|g__Akkermansia.s__Akkermansia_muciniphila	0	0	0	0	0	0	0	0	0	0	0	0	0	0	0	0	0	0	0	0	0	0	0	0	0	0	0	0	0	0	0	0	0	0	0	0	0	0	0	0	0	0	0	0	0	0	0	0	0
K00677|g__Bacteroides.s__Bacteroides_dorei	0	0	0	0	7.47986e-06	1.52677e-07	0	0	4.04016e-05	0	0	0	0	0	0	0	0	0	0	0	0	0	0	6.52969e-06	5.12827e-06	4.12131e-07	0	0	0	0	0	0	0	0	3.67866e-06	7.25863e-06	0	0	0	0	0	0	0	0	0	0	0	0	0
K00677|g__Bacteroides.s__Bacteroides_massiliensis	0	0	0	0	0	0	0	0	0	0	0	0	0	0	0	1.21176e-06	7.18787e-07	4.35248e-07	3.15704e-06	0	5.99084e-07	5.3447e-07	1.11344e-06	5.04106e-06	0	0	0	0	7.8227e-07	0	0	0	0	0	0	0	0	0	0	0	0	4.33354e-07	1.8015e-06	0	0	0	0	0	0
K00677|g__Bacteroides.s__Bacteroides_vulgatus	2.38256e-05	1.17649e-07	1.76773e-06	8.57277e-07	1.84806e-05	2.37014e-07	7.53948e-07	5.98271e-07	0	1.03528e-06	3.33135e-06	0	3.21286e-06	0	0	1.51674e-06	1.03688e-07	0	4.9658e-07	1.56647e-07	4.28485e-08	2.66055e-07	5.5776e-07	1.11322e-05	1.8618e-06	1.02869e-06	0	1.63422e-05	2.54625e-05	0	0	0	0	1.54915e-05	1.13435e-05	1.08747e-05	0	1.08831e-06	2.15008e-06	3.05562e-06	4.79811e-05	9.53411e-06	6.59102e-06	1.53252e-05	9.30058e-06	1.28029e-06	3.82237e-07	2.99048e-06	1.42589e-05
K00677|g__Bacteroides.s__Bacteroides_vulgatus_CAG_6	1.67267e-05	3.13362e-07	1.18756e-06	5.31721e-07	1.17835e-05	2.77905e-07	3.74427e-07	2.76566e-07	0	1.51077e-06	5.35279e-06	0	2.02556e-06	0	0	3.21458e-06	1.03688e-07	0	7.65573e-07	2.11282e-07	2.77673e-07	2.407e-07	1.19737e-06	6.81041e-06	1.25208e-06	7.49983e-07	0	1.07645e-05	1.28639e-05	0	0	0	0	7.74504e-06	6.00266e-06	6.78945e-06	0	7.72897e-07	1.20722e-06	2.10487e-06	3.20321e-05	6.78644e-06	7.57258e-06	9.15584e-06	1.70996e-05	2.08554e-06	8.92723e-07	5.53996e-06	3.61677e-06
K00677|g__Campylobacter.s__Campylobacter_concisus	0	0	0	0	0	0	0	0	6.10259e-07	0	0	0	0	0	0	0	0	0	0	0	0	0	0	0	0	0	0	0	0	0	0	0	0	0	0	0	0	0	0	0	0	0	0	0	0	0	0	0	0
K00677|g__Citrobacter.s__Citrobacter_braakii	0	0	0	0	0	0	0	0	0	0	0	0	0	0	0	0	0	0	0	0	0	0	0	0	0	0	0	0	0	0	0	0	0	0	0	0	0	0	0	0	0	0	0	0	0	0	0	0	0
K00677|g__Citrobacter.s__Citrobacter_freundii	0	0	0	0	0	0	0	0	0	0	0	0	0	0	0	0	0	0	0	0	0	0	0	0	0	1.72693e-06	0	0	0	0	0	0	0	0	0	0	0	0	0	0	0	0	0	0	0	0	0	0	0
K00677|g__Citrobacter.s__Citrobacter_portucalensis	0	0	0	0	0	0	0	0	0	0	0	0	0	0	0	0	0	0	0	0	0	0	0	0	0	8.63635e-07	0	0	0	0	0	0	0	0	0	0	0	0	0	0	0	0	0	0	0	0	0	0	0
K00677|g__Citrobacter.s__Citrobacter_werkmanii	0	0	0	0	0	0	0	0	0	0	0	0	0	0	0	0	0	0	0	0	0	0	0	0	0	0	0	0	0	0	0	0	0	0	0	0	0	0	0	0	0	0	0	0	0	0	0	0	0
K00677|g__Citrobacter.s__Citrobacter_youngae	0	0	0	0	0	0	0	0	0	0	0	0	0	0	0	0	0	0	0	0	0	0	0	0	0	5.97809e-07	0	0	0	0	0	0	0	0	0	0	0	0	0	0	0	0	0	0	0	0	0	0	0
K00677|g__Enterobacter.s__Enterobacter_bugandensis	0	0	0	0	0	0	0	0	0	0	0	0	0	0	0	0	0	0	0	0	0	0	0	0	0	0	0	0	0	0	0	0	0	0	0	0	0	0	0	0	0	0	0	0	0	0	0	0	0
K00677|g__Enterobacter.s__Enterobacter_cloacae_complex	1.35562e-06	3.62332e-06	0	0	0	0	0	0	0	0	0	0	0	0	0	0	0	0	0	0	0	0	0	0	0	0	0	0	0	0	0	0	0	0	0	0	0	2.4675e-07	0	0	0	0	0	0	0	0	0	0	0
K00677|g__Enterobacter.s__Enterobacter_mori	0	0	0	0	0	0	7.40559e-08	0	0	0	0	0	0	0	0	0	0	0	0	0	0	0	0	0	0	0	0	0	0	0	0	0	0	0	0	0	0	0	0	0	0	0	0	0	0	0	0	0	0
K00677|g__Escherichia.s__Escherichia_coli	1.91604e-06	9.92932e-07	4.32545e-07	9.55645e-07	1.02683e-06	3.59503e-06	8.08738e-07	2.16719e-06	8.65087e-06	2.1934e-06	1.65948e-05	1.59681e-05	4.2318e-07	0	1.70491e-06	3.41801e-05	8.98789e-07	6.59954e-06	7.67912e-06	1.68588e-06	2.01915e-06	3.75668e-07	3.78099e-07	3.64205e-06	2.62887e-06	4.59454e-07	0.00012962	0	0	0.000105161	0	0	3.66492e-06	5.81167e-05	0	1.30203e-07	3.35601e-05	2.18188e-06	1.30114e-07	3.06941e-06	2.01611e-07	1.14611e-05	0	4.48282e-05	1.14754e-06	1.68971e-07	0	6.2065e-08	5.19731e-05
K00677|g__Fusobacterium.s__Fusobacterium_mortiferum	4.79271e-07	0	0	0	0	0	0	0	0	1.25618e-05	2.8417e-07	0	0	0	0	0	0	0	0	0	0	0	0	0	0	0	0	0	0	0	0	0	0	0	0	0	0	0	0	0	0	0	0	0	0	0	0	0	0
K00677|g__Fusobacterium.s__Fusobacterium_nucleatum	0	0	0	0	0	0	0	0	1.96327e-07	0	0	0	0	0	0	0	0	0	0	0	0	0	0	0	0	0	0	0	0	0	0	0	0	0	0	0	0	0	0	0	0	0	0	0	0	0	0	0	0
K00677|g__Haemophilus.s__Haemophilus_haemolyticus	0	0	0	0	0	0	0	0	0	1.46234e-06	0	0	0	0	0	0	0	0	0	0	0	0	0	0	0	0	0	0	0	0	0	0	0	0	0	0	0	0	0	0	0	0	0	0	0	0	0	0	0
K00677|g__Haemophilus.s__Haemophilus_parainfluenzae	3.68007e-07	6.9035e-07	1.04361e-06	0	1.02465e-06	0	2.18376e-07	1.33675e-07	0	9.90298e-07	1.7484e-07	0	0	0	0	0	0	0	0	3.54459e-07	5.56103e-07	2.81935e-07	0	0	1.0213e-06	0	0	0	0	0	0	0	0	0	0	0	0	2.98723e-06	0	0	3.58922e-07	2.37301e-06	0	2.18463e-06	0	5.58167e-07	2.90639e-06	0	0
K00677|g__Haemophilus.s__Haemophilus_sp_HMSC71H05	4.73114e-07	0	1.24945e-06	0	0	0	0	0	0	0	0	0	0	0	0	0	0	0	0	0	0	0	0	0	0	0	0	0	0	0	0	0	0	0	0	0	0	3.17449e-06	0	0	0	0	0	0	0	1.06915e-06	1.92246e-06	0	0
K00677|g__Klebsiella.s__Klebsiella_aerogenes	0	0	0	0	0	0	0	0	0	0	0	0	0	0	0	0	0	0	6.44682e-08	0	0	0	0	0	0	0	0	0	0	0	0	0	0	0	0	0	0	0	0	0	0	0	0	0	0	0	0	0	0
K00677|g__Klebsiella.s__Klebsiella_michiganensis	0	0	0	0	0	0	0	0	0	0	0	0	0	0	0	0	0	0	0	0	0	0	0	0	0	0	0	0	0	0	0	0	0	0	0	0	0	0	0	0	0	0	0	0	0	0	0	0	0
K00677|g__Klebsiella.s__Klebsiella_oxytoca	0	0	0	0	0	0	0	0	0	0	0	0	0	0	0	0	0	0	0	0	0	0	0	0	0	0	0	0	0	0	0	0	0	0	0	0	0	0	0	0	0	0	0	0	0	0	0	0	0
K00677|g__Klebsiella.s__Klebsiella_pneumoniae	1.57727e-07	5.06824e-06	1.44418e-07	4.74382e-07	7.03215e-06	2.02734e-06	3.3842e-06	1.33958e-05	0	0	0	0	0	0	0	0	0	0	7.3896e-07	6.61933e-06	8.78911e-06	3.83465e-06	1.11493e-06	0	0	1.90899e-06	0	0	0	0	0	0	1.34005e-06	0	0	4.34753e-08	0	0	0	3.48737e-07	0	0	0	1.34837e-06	2.42785e-07	0	0	6.2065e-08	0
K00677|g__Klebsiella.s__Klebsiella_quasipneumoniae	3.15421e-07	6.84677e-07	1.44325e-07	0	9.33485e-08	0	0	0	0	0	0	0	0	0	0	0	0	0	0	4.58073e-08	0	0	0	0	0	0	0	0	0	0	0	0	0	0	0	0	0	0	0	2.86851e-07	0	0	0	1.68867e-07	6.06769e-08	0	0	0	0
K00677|g__Klebsiella.s__Klebsiella_variicola	1.0514e-07	2.25795e-07	0	7.9637e-08	9.33485e-08	0	0	1.33761e-07	0	0	0	0	0	0	0	0	0	0	0	0	0	0	0	0	0	6.55209e-08	0	0	0	0	0	0	0	0	0	0	0	0	0	4.6528e-07	0	0	0	0	0	0	0	0	0
K00677|g__Klebsiella.s__Klebsiella_variicola_CAG_634	1.0514e-07	5.30194e-07	0	1.59274e-07	4.66593e-08	0	3.32007e-08	7.53859e-07	0	0	0	0	0	0	0	0	0	0	0	0	0	0	0	0	0	6.64138e-08	0	0	0	0	0	0	0	0	0	0	0	0	0	7.53286e-07	0	0	0	0	0	0	0	1.2417e-07	0
K00677|g__Kluyvera.s__Kluyvera_ascorbata	0	0	0	0	0	0	0	0	0	0	0	0	0	0	0	0	0	0	0	0	0	0	0	0	0	0	0	0	0	0	0	0	0	0	0	0	0	0	0	0	0	0	0	0	0	0	0	0	0
K00677|g__Kluyvera.s__Kluyvera_cryocrescens	0	0	0	0	0	0	0	0	0	0	0	0	0	0	0	0	0	0	0	0	0	0	0	0	0	7.90715e-07	0	0	0	0	0	0	0	0	0	0	0	0	0	0	0	0	0	0	0	0	0	0	0
K00677|g__Kluyvera.s__Kluyvera_georgiana	0	0	0	0	0	0	0	0	0	0	0	0	0	0	0	0	0	0	0	0	0	0	0	0	0	0	0	0	0	0	0	0	0	0	0	0	0	0	0	0	0	0	0	0	0	0	0	0	0
K00677|g__Raoultella.s__Raoultella_ornithinolytica	0	0	0	0	0	0	0	0	0	0	0	0	0	0	0	0	0	0	0	0	0	0	0	0	0	2.91009e-06	0	0	0	0	0	0	0	0	0	0	0	0	0	0	0	0	0	0	0	0	0	0	0
K00677|g__Raoultella.s__Raoultella_planticola	0	0	0	0	0	0	0	0	0	0	0	0	0	0	0	0	0	0	0	0	0	0	0	0	0	7.29276e-07	0	0	0	0	0	0	0	0	0	0	0	0	0	0	0	0	0	0	0	0	0	0	0
K00677|unclassified	0	0	1.03332e-06	2.15214e-06	2.11924e-06	6.25895e-07	2.08176e-06	1.64076e-06	0	0	0	0	0	0	0	0	0	0	0	0	0	6.861e-07	0	0	1.17483e-06	1.64797e-06	0	0	1.9777e-06	0	0	0	0	0	0	2.76166e-06	0	0	0	2.04931e-06	0	0	0	0	0	0	0	0	0
K00748	3.0077e-05	6.76753e-06	4.40095e-06	2.19462e-06	3.63955e-05	2.22936e-06	3.37392e-06	9.64286e-06	2.91313e-05	1.16948e-05	1.03468e-05	2.22288e-06	4.52396e-06	0	0	8.89316e-06	0	1.38696e-06	3.07155e-06	6.77993e-06	8.23594e-06	3.71185e-06	2.35061e-06	1.60963e-05	6.74754e-06	5.40307e-06	0	2.53005e-05	3.5065e-05	1.58869e-05	0	8.36996e-06	1.64356e-06	2.13683e-05	2.09333e-05	2.38397e-05	0	6.63312e-06	2.15216e-06	7.08606e-06	6.78295e-05	1.25498e-05	1.225e-05	2.03736e-05	2.27937e-05	3.52954e-06	3.32917e-06	4.78727e-06	1.35494e-05
K00748|g__Aeromonas.s__Aeromonas_veronii	0	0	0	0	0	0	0	0	4.6986e-07	0	0	0	0	0	0	0	0	0	0	0	0	0	0	0	0	0	0	0	0	0	0	0	0	0	0	0	0	0	0	0	0	0	0	0	0	0	0	0	0
K00748|g__Bacteroides.s__Bacteroides_cellulosilyticus	0	0	0	0	0	0	3.04447e-07	0	0	0	0	0	0	0	0	0	0	0	0	0	0	0	0	0	0	0	0	0	0	0	0	0	0	0	0	0	0	0	0	0	0	0	0	0	0	0	0	0	0
K00748|g__Bacteroides.s__Bacteroides_dorei	0	0	0	0	1.26303e-06	0	0	0	2.67818e-05	0	0	0	0	0	0	0	0	0	0	0	0	0	0	2.06632e-06	3.7096e-06	2.12337e-07	0	0	0	0	0	0	0	0	5.32734e-07	3.02438e-06	0	0	0	0	0	0	0	0	0	0	0	0	0
K00748|g__Bacteroides.s__Bacteroides_faecis	0	0	0	0	0	0	1.43514e-07	3.44502e-07	0	0	0	0	0	0	0	0	0	0	0	0	0	0	0	0	0	0	0	0	5.52457e-07	0	0	0	0	0	0	0	0	0	0	2.26269e-07	0	0	0	0	0	0	0	0	0
K00748|g__Bacteroides.s__Bacteroides_intestinalis	0	0	0	0	0	0	3.54426e-07	0	0	0	0	0	0	0	0	0	0	0	0	0	0	0	0	0	0	3.41891e-07	0	0	0	0	0	0	0	0	0	0	0	0	0	0	0	0	0	0	0	0	0	0	0
K00748|g__Bacteroides.s__Bacteroides_thetaiotaomicron	0	0	4.63936e-07	3.84781e-07	9.07019e-07	0	0	0	0	0	0	0	1.49965e-07	0	0	0	0	0	0	0	0	0	0	0	0	0	0	0	6.39224e-08	0	0	0	0	0	0	0	0	0	0	8.29629e-07	0	0	0	0	0	0	0	0	0
K00748|g__Bacteroides.s__Bacteroides_vulgatus	1.10713e-05	1.48099e-07	1.92084e-06	9.48917e-07	1.65698e-05	2.47827e-07	4.99812e-07	2.54197e-07	0	5.88271e-07	2.73609e-06	0	1.3661e-06	0	0	1.9008e-06	0	2.74197e-07	3.53884e-07	3.95394e-07	4.27464e-07	5.14424e-07	1.11708e-06	9.21677e-06	2.01208e-06	6.86418e-07	0	9.61969e-06	1.40459e-05	0	0	3.04505e-06	0	1.72391e-05	1.38538e-05	1.52516e-05	0	6.47557e-07	1.03434e-06	1.84182e-06	3.15903e-05	6.76584e-06	6.63372e-06	7.83652e-06	1.73015e-05	2.0717e-06	5.60869e-07	3.15975e-06	6.77472e-06
K00748|g__Bacteroides.s__Bacteroides_vulgatus_CAG_6	1.50464e-05	1.97923e-07	8.35454e-07	3.32615e-07	1.21752e-05	3.19976e-07	3.8118e-07	3.16226e-07	0	6.49104e-07	3.902e-06	0	3.00789e-06	0	0	7.01765e-07	0	1.62926e-07	3.53884e-07	1.64952e-07	6.62952e-08	7.38974e-08	2.98299e-07	3.79069e-06	3.78703e-07	8.97564e-07	0	1.56808e-05	2.04027e-05	0	0	2.52462e-06	0	4.1292e-06	6.2704e-06	5.56376e-06	0	4.03695e-07	1.11782e-06	2.66541e-06	3.59833e-05	4.83927e-06	5.61624e-06	9.97585e-06	5.49212e-06	6.16377e-07	2.79797e-07	1.35514e-06	6.77472e-06
K00748|g__Campylobacter.s__Campylobacter_concisus	0	0	0	0	0	0	0	0	2.20696e-07	0	0	0	0	0	0	0	0	0	0	0	0	0	0	0	0	0	0	0	0	0	0	0	0	0	0	0	0	0	0	0	0	0	0	0	0	0	0	0	0
K00748|g__Citrobacter.s__Citrobacter_braakii	0	0	0	0	0	0	0	0	0	0	0	0	0	0	0	0	0	0	0	0	0	0	0	0	0	0	0	0	0	0	0	0	0	0	0	0	0	0	0	0	0	0	0	0	0	0	0	0	0
K00748|g__Citrobacter.s__Citrobacter_freundii	0	0	0	0	0	0	0	0	0	0	0	0	0	0	0	0	0	0	0	0	0	0	0	0	0	2.97629e-07	0	0	0	0	0	0	0	0	0	0	0	0	0	0	0	0	0	0	0	0	0	0	0
K00748|g__Citrobacter.s__Citrobacter_portucalensis	0	0	0	0	0	0	0	0	0	0	0	0	0	0	0	0	0	0	0	0	0	0	0	0	0	1.56748e-06	0	0	0	0	0	0	0	0	0	0	0	0	0	0	0	0	0	0	0	0	0	0	0
K00748|g__Citrobacter.s__Citrobacter_werkmanii	0	0	0	0	0	0	0	0	0	0	0	0	0	0	0	0	0	0	0	0	0	0	0	0	0	0	0	0	0	0	0	0	0	0	0	0	0	0	0	0	0	0	0	0	0	0	0	0	0
K00748|g__Citrobacter.s__Citrobacter_youngae	0	0	0	0	0	0	0	0	0	0	0	0	0	0	0	0	0	0	0	0	0	0	0	0	0	1.27555e-07	0	0	0	0	0	0	0	0	0	0	0	0	0	0	0	0	0	0	0	0	0	0	0
K00748|g__Cloacibacillus.s__Cloacibacillus_porcorum	0	0	0	0	0	0	0	1.44803e-07	0	0	0	0	0	0	0	0	0	0	0	0	0	0	0	0	0	0	0	0	0	0	0	0	0	0	0	0	0	0	0	0	0	0	0	0	0	0	0	0	0
K00748|g__Dialister.s__Dialister_pneumosintes	0	0	0	0	0	0	0	0	1.97358e-07	0	0	0	0	0	0	0	0	0	0	0	0	0	0	0	0	0	0	0	0	0	0	0	0	0	0	0	0	0	0	0	0	0	0	0	0	0	0	0	0
K00748|g__Enterobacter.s__Enterobacter_bugandensis	0	0	0	0	0	0	0	0	0	0	0	0	0	0	0	0	0	0	0	0	0	0	0	0	0	0	0	0	0	0	0	0	0	0	0	0	0	0	0	0	0	0	0	0	0	0	0	0	0
K00748|g__Enterobacter.s__Enterobacter_cloacae_complex	1.80982e-06	2.82537e-06	0	0	0	0	0	0	0	0	0	0	0	0	0	0	0	0	0	0	0	0	0	0	0	0	0	0	0	0	0	0	0	0	0	0	0	2.38688e-07	0	0	0	0	0	0	0	0	0	0	0
K00748|g__Enterobacter.s__Enterobacter_mori	0	0	0	0	0	0	1.89465e-07	0	0	0	0	0	0	0	0	0	0	0	0	0	0	0	0	0	0	0	0	0	0	0	0	0	0	0	0	0	0	0	0	0	0	0	0	0	0	0	0	0	0
K00748|g__Escherichia.s__Escherichia_coli	3.33723e-07	2.70119e-07	3.08058e-08	2.2831e-07	2.96326e-08	3.17494e-07	2.36979e-08	3.9646e-07	9.55672e-07	0	2.78969e-06	2.22288e-06	0	0	0	6.29057e-06	0	9.4984e-07	1.44268e-06	1.96177e-07	9.28318e-08	3.00763e-08	0	0	2.18453e-07	4.25184e-08	0	0	0	1.58869e-05	0	0	0	0	0	0	0	1.60435e-07	0	3.3469e-07	0	0	0	9.68717e-07	0	0	0	0	0
K00748|g__Fusobacterium.s__Fusobacterium_mortiferum	1.01718e-06	0	0	0	0	0	0	2.44838e-07	0	9.42988e-06	3.3784e-07	0	0	0	0	0	0	0	0	0	0	0	0	1.02251e-06	0	0	0	0	0	0	0	0	0	0	0	0	0	0	0	0	0	0	0	0	0	0	0	0	0
K00748|g__Haemophilus.s__Haemophilus_haemolyticus	0	0	0	0	0	0	0	0	0	6.83908e-07	0	0	0	0	0	0	0	0	0	0	0	0	0	0	0	0	0	0	0	0	0	0	0	0	0	0	0	0	0	0	0	0	0	0	0	0	0	0	0
K00748|g__Haemophilus.s__Haemophilus_parainfluenzae	2.30669e-07	3.11275e-07	3.29992e-07	2.49181e-07	7.87414e-07	0	1.62473e-07	0	0	3.43592e-07	5.47369e-07	0	0	0	0	0	0	0	1.0022e-07	0	2.33114e-07	0	0	0	4.2868e-07	0	0	0	0	0	0	0	4.46741e-07	0	2.76385e-07	0	0	2.03965e-06	0	0	2.55918e-07	7.31295e-07	0	1.18861e-06	0	4.21454e-07	5.80784e-07	2.33479e-07	0
K00748|g__Haemophilus.s__Haemophilus_sp_HMSC71H05	1.31821e-07	0	4.52045e-07	0	0	0	0	0	0	0	0	0	0	0	0	0	0	0	0	0	0	0	0	0	0	0	0	0	0	0	0	0	0	0	0	0	0	2.786e-06	0	0	0	0	0	0	0	4.20013e-07	1.90768e-06	3.88999e-08	0
K00748|g__Klebsiella.s__Klebsiella_aerogenes	0	0	0	0	0	0	0	0	0	0	0	0	0	0	0	0	0	0	1.23469e-07	0	0	0	0	0	0	0	0	0	0	0	0	0	0	0	0	0	0	0	0	0	0	0	0	0	0	0	0	0	0
K00748|g__Klebsiella.s__Klebsiella_michiganensis	0	0	0	0	0	0	0	0	0	0	0	0	0	0	0	0	0	0	0	0	0	0	0	0	0	0	0	0	0	0	0	0	0	0	0	0	0	0	0	0	0	0	0	0	0	0	0	0	0
K00748|g__Klebsiella.s__Klebsiella_oxytoca	0	0	0	0	0	0	0	0	0	0	0	0	0	0	0	0	0	0	0	0	0	0	0	0	0	0	0	0	0	0	0	0	0	0	0	0	0	0	0	0	0	0	0	0	0	0	0	0	0
K00748|g__Klebsiella.s__Klebsiella_pneumoniae	1.00632e-07	1.38706e-06	9.21402e-08	0	4.51652e-06	1.14534e-06	1.22039e-06	7.29235e-06	0	0	0	0	0	0	0	0	0	0	6.56235e-07	5.81945e-06	7.40335e-06	3.09343e-06	9.10609e-07	0	0	0	0	0	0	0	0	0	1.19682e-06	0	0	0	0	0	0	1.85546e-07	0	0	0	2.42517e-07	0	0	0	0	0
K00748|g__Klebsiella.s__Klebsiella_quasipneumoniae	1.6772e-07	1.071e-06	2.75743e-07	0	1.19098e-07	0	4.72536e-08	1.69683e-07	0	0	0	0	0	0	0	0	0	0	4.11359e-08	0	1.28904e-08	0	2.46317e-08	0	0	0	0	0	0	0	0	0	0	0	0	0	0	0	0	3.71464e-08	0	0	0	5.38927e-08	0	0	0	0	0
K00748|g__Klebsiella.s__Klebsiella_variicola	1.00632e-07	2.65085e-07	0	2.53819e-08	2.77805e-08	2.30748e-08	4.72536e-08	1.40095e-07	0	0	0	0	0	0	0	0	0	0	0	0	0	0	0	0	0	4.23909e-08	0	0	0	0	0	0	0	0	0	0	0	0	0	3.71204e-07	0	0	0	8.05688e-08	0	0	0	0	0
K00748|g__Klebsiella.s__Klebsiella_variicola_CAG_634	6.70878e-08	2.91655e-07	0	2.54074e-08	0	0	0	3.39737e-07	0	0	0	0	0	0	0	0	0	0	0	0	0	0	0	0	0	8.47818e-08	0	0	0	0	0	0	0	0	0	0	0	0	0	5.94306e-07	0	0	0	2.69464e-08	0	0	0	0	0
K00748|g__Kluyvera.s__Kluyvera_ascorbata	0	0	0	0	0	0	0	0	0	0	0	0	0	0	0	0	0	0	0	0	0	0	0	0	0	0	0	0	0	0	0	0	0	0	0	0	0	0	0	0	0	0	0	0	0	0	0	0	0
K00748|g__Kluyvera.s__Kluyvera_cryocrescens	0	0	0	0	0	0	0	0	0	0	0	0	0	0	0	0	0	0	0	0	0	0	0	0	0	1.27555e-07	0	0	0	0	0	0	0	0	0	0	0	0	0	0	0	0	0	0	0	0	0	0	0
K00748|g__Kluyvera.s__Kluyvera_georgiana	0	0	0	0	0	0	0	0	0	0	0	0	0	0	0	0	0	0	0	0	0	0	0	0	0	0	0	0	0	0	0	0	0	0	0	0	0	0	0	0	0	0	0	0	0	0	0	0	0
K00748|g__Leclercia.s__Leclercia_adecarboxylata	0	0	0	0	0	0	0	0	0	0	0	0	0	0	0	0	0	0	0	0	0	0	0	0	0	0	0	0	0	0	0	0	0	0	0	0	0	0	0	0	0	0	0	0	0	0	0	0	0
K00748|g__Neisseria.s__Neisseria_elongata	0	0	0	0	0	0	0	0	0	0	0	0	0	0	0	0	0	0	0	0	0	0	0	0	0	0	0	0	0	0	0	0	0	0	0	0	0	0	0	0	0	0	0	0	0	0	0	0	0
K00748|g__Raoultella.s__Raoultella_ornithinolytica	0	0	0	0	0	0	0	0	0	0	0	0	0	0	0	0	0	0	0	0	0	0	0	0	0	6.78552e-07	0	0	0	0	0	0	0	0	0	0	0	0	0	0	0	0	0	0	0	0	0	0	0
K00748|g__Raoultella.s__Raoultella_planticola	0	0	0	0	0	0	0	0	0	0	0	0	0	0	0	0	0	0	0	0	0	0	0	0	0	2.96396e-07	0	0	0	0	0	0	0	0	0	0	0	0	0	0	0	0	0	0	0	0	0	0	0
K00748|unclassified	0	0	0	0	0	1.75654e-07	0	0	5.05886e-07	0	3.37504e-08	0	0	0	0	0	0	0	0	2.03926e-07	0	0	0	0	0	0	0	0	0	0	0	2.80029e-06	0	0	0	0	0	3.57089e-07	0	0	0	2.13388e-07	0	0	0	0	0	0	0
K02517	1.86328e-05	1.17973e-06	7.14202e-06	6.39387e-06	3.35186e-05	2.50014e-06	5.1432e-06	6.35594e-06	7.44018e-05	1.30112e-05	1.41976e-05	5.32304e-06	3.60333e-06	0	5.42891e-07	8.68861e-06	7.05469e-07	1.72724e-06	2.90418e-06	2.39653e-06	3.42305e-06	3.77407e-06	1.96048e-06	1.36446e-05	1.74134e-05	3.82096e-06	3.08896e-05	1.92373e-05	3.03356e-05	2.42015e-05	0	3.17022e-06	4.19274e-06	4.20003e-05	1.70655e-05	2.94329e-05	4.03255e-05	7.26515e-06	2.35371e-06	9.49324e-06	5.05306e-05	1.70957e-05	9.36291e-06	2.98479e-05	2.08785e-05	4.67118e-06	3.12576e-06	5.2462e-06	1.15777e-05
K02517|g__Alistipes.s__Alistipes_finegoldii	0	1.58584e-07	0	0	0	2.20697e-07	1.81881e-07	7.71349e-07	0	0	0	0	0	0	0	0	0	0	0	0	0	0	0	0	0	0	0	0	1.36372e-07	0	0	0	0	0	0	0	0	0	0	1.10564e-06	0	0	0	0	0	0	0	0	0
K02517|g__Bacteroides.s__Bacteroides_cellulosilyticus	0	0	0	0	0	0	0	0	0	0	0	0	0	0	0	0	0	0	0	0	0	0	0	0	0	0	0	0	0	0	0	0	0	0	0	0	0	0	0	0	0	0	0	0	0	0	0	0	0
K02517|g__Bacteroides.s__Bacteroides_dorei	0	0	0	0	2.50081e-06	9.51253e-08	0	0	3.11397e-05	0	0	0	0	0	0	0	0	0	0	0	0	0	0	1.01194e-06	2.60604e-06	1.0974e-07	0	0	0	0	0	0	0	0	2.35444e-06	4.12267e-06	0	0	0	0	0	0	0	0	0	0	0	0	0
K02517|g__Bacteroides.s__Bacteroides_faecis	0	0	0	0	0	0	1.85578e-07	0	0	0	0	0	0	0	0	0	0	0	0	0	0	0	0	0	0	0	0	0	5.65195e-07	0	0	0	0	0	0	0	0	0	2.95782e-07	6.47659e-07	0	0	0	0	0	0	0	0	0
K02517|g__Bacteroides.s__Bacteroides_fragilis	0	0	0	0	0	0	0	0	2.60937e-05	0	0	0	0	0	0	0	0	0	0	0	0	0	0	1.89858e-06	4.66816e-06	0	0	0	0	0	0	0	1.91062e-06	1.37366e-06	2.01184e-06	3.52331e-06	1.60483e-05	4.80865e-07	0	0	4.7305e-07	1.15176e-06	1.93847e-07	0	0	6.21531e-07	0	0	0
K02517|g__Bacteroides.s__Bacteroides_fragilis_CAG_47	0	0	0	0	0	0	0	0	1.46471e-05	0	0	0	0	0	0	0	0	0	0	0	0	0	0	4.21942e-07	2.49852e-06	0	0	0	0	0	0	0	9.94539e-07	4.57887e-07	8.01358e-07	1.44123e-06	7.29943e-06	2.14502e-07	0	0	1.31618e-07	7.13416e-07	0	0	0	9.63798e-08	0	0	0
K02517|g__Bacteroides.s__Bacteroides_thetaiotaomicron	0	0	3.26573e-07	3.06163e-07	1.16278e-06	0	0	0	9.88263e-08	0	0	0	0	0	0	0	0	0	0	0	0	0	0	0	0	0	0	0	3.95662e-07	0	0	0	0	0	0	0	0	0	3.72469e-08	7.49896e-07	3.08323e-07	0	0	0	6.66553e-07	0	0	2.66617e-07	0
K02517|g__Bacteroides.s__Bacteroides_vulgatus	7.65494e-06	0	7.11584e-07	4.25249e-07	1.25537e-05	1.5855e-07	2.75204e-07	2.57278e-07	0	5.89499e-07	3.23388e-06	0	1.33176e-06	0	0	1.03856e-06	0	0	3.19432e-07	2.51401e-07	3.39924e-07	5.75569e-07	3.50675e-07	2.81174e-06	9.22223e-07	3.29178e-07	0	7.54591e-06	1.00824e-05	0	0	6.53705e-07	0	7.07037e-06	4.53826e-06	5.75283e-06	0	2.56897e-07	7.12603e-07	1.05411e-06	2.13008e-05	4.73313e-06	3.73141e-06	4.87002e-06	1.13241e-05	2.39645e-06	5.11282e-07	2.63792e-06	0
K02517|g__Bacteroides.s__Bacteroides_vulgatus_CAG_6	9.58888e-06	0	1.42132e-06	2.95944e-07	8.08679e-06	2.80191e-07	5.4472e-07	3.29237e-07	0	1.19e-06	4.39299e-06	0	2.15834e-06	0	0	5.54532e-07	0	0	3.46045e-07	8.43887e-08	2.55473e-07	1.33704e-07	5.71545e-07	4.84318e-06	1.73417e-06	4.38748e-07	0	1.16914e-05	1.38428e-05	0	0	2.51651e-06	0	1.144e-05	7.13543e-06	9.15793e-06	0	4.13963e-07	9.64727e-07	1.96384e-06	2.83168e-05	5.66974e-06	4.98703e-06	5.89104e-06	8.48525e-06	7.84338e-07	5.13513e-07	1.94126e-06	0
K02517|g__Campylobacter.s__Campylobacter_concisus	0	0	0	0	0	0	0	0	1.97653e-07	0	0	0	0	0	0	0	0	0	0	0	0	0	0	0	0	0	0	0	0	0	0	0	0	0	0	0	0	0	0	0	0	0	0	0	0	0	0	0	0
K02517|g__Escherichia.s__Escherichia_coli	3.0489e-07	0	0	0	3.86926e-07	4.41592e-07	3.06888e-08	3.28153e-07	2.22481e-06	3.78864e-07	2.36438e-06	5.32304e-06	0	0	3.51111e-07	7.09552e-06	7.05469e-07	1.15285e-06	9.60689e-07	1.27123e-07	5.32271e-07	1.36351e-07	3.19941e-08	2.6571e-06	1.01161e-06	2.20288e-07	3.08896e-05	0	0	2.30959e-05	0	0	6.58353e-07	2.16584e-05	0	0	1.69778e-05	1.29259e-06	2.1571e-07	4.80519e-07	0	3.46551e-06	0	9.81334e-06	2.01337e-07	0	0	0	1.15777e-05
K02517|g__Fusobacterium.s__Fusobacterium_mortiferum	1.81379e-07	0	0	0	0	0	0	0	0	9.07366e-06	2.71346e-07	0	0	0	0	0	0	0	0	0	0	0	0	0	0	0	0	0	0	0	0	0	0	0	0	0	0	0	0	0	0	0	0	0	0	0	0	0	0
K02517|g__Haemophilus.s__Haemophilus_haemolyticus	0	0	0	0	0	0	0	0	0	9.63157e-07	0	0	0	0	0	0	0	0	0	0	0	0	0	0	0	0	0	0	0	0	0	0	0	0	0	0	0	0	0	0	0	0	0	0	0	0	0	0	0
K02517|g__Haemophilus.s__Haemophilus_parainfluenzae	2.99271e-07	4.02207e-07	6.20522e-07	0	1.5138e-06	1.56117e-07	1.49249e-07	0	0	8.15987e-07	4.82152e-07	0	0	0	0	0	0	0	0	1.03859e-06	6.73853e-07	1.14621e-07	0	0	9.92122e-07	0	0	0	0	0	0	0	0	0	2.24107e-07	0	0	4.09852e-06	0	0	0	1.3621e-06	0	1.36735e-06	0	3.62668e-07	4.55482e-07	1.99069e-07	0
K02517|g__Haemophilus.s__Haemophilus_sp_HMSC71H05	2.54792e-07	0	3.52295e-07	0	0	0	0	0	0	0	0	0	0	0	0	0	0	0	0	0	0	0	0	0	0	0	0	0	0	0	0	0	0	0	0	0	0	5.07818e-07	0	0	0	0	0	0	0	4.09812e-07	7.56229e-07	2.01373e-07	0
K02517|g__Klebsiella.s__Klebsiella_oxytoca	0	0	0	0	0	0	0	0	0	0	0	0	0	0	0	0	0	0	0	0	0	0	0	0	0	0	0	0	0	0	0	0	0	0	0	0	0	0	0	0	0	0	0	0	0	0	0	0	0
K02517|g__Klebsiella.s__Klebsiella_pneumoniae	3.48662e-07	0	0	0	4.25639e-07	4.42771e-07	9.209e-08	6.90659e-07	0	0	3.313e-06	0	0	0	0	0	0	0	1.27802e-06	1.69399e-07	3.42258e-07	7.79126e-08	9.41293e-08	0	0	3.23225e-07	0	0	0	0	0	0	2.93212e-07	0	0	0	0	0	0	6.24299e-07	0	0	0	7.90609e-06	2.01337e-07	0	0	0	0
K02517|g__Megasphaera.s__Megasphaera_elsdenii	0	0	0	0	0	0	0	0	0	0	0	0	0	0	0	0	0	0	0	7.25625e-07	1.15776e-06	1.62759e-06	7.70057e-07	0	0	0	0	0	0	0	0	0	0	0	0	0	0	0	0	0	0	0	0	0	0	0	0	0	0
K02517|g__Neisseria.s__Neisseria_elongata	0	0	0	0	0	0	0	0	0	0	0	0	0	0	0	0	0	0	0	0	0	0	0	0	0	0	0	0	0	0	0	0	0	0	0	0	0	0	0	0	0	0	0	0	0	0	0	0	0
K02517|g__Veillonella.s__Veillonella_atypica	0	0	0	0	0	0	0	0	0	0	1.39858e-07	0	0	0	1.91781e-07	0	0	4.81632e-07	0	0	0	0	0	0	0	0	0	0	1.61006e-07	0	0	0	0	0	0	0	0	0	0	0	0	0	0	0	0	0	3.00707e-07	0	0
K02517|unclassified	0	6.1894e-07	3.70976e-06	5.36654e-06	6.88808e-06	7.05072e-07	3.68377e-06	3.97921e-06	0	0	0	0	1.13227e-07	0	0	0	0	9.27939e-08	0	0	1.2153e-07	1.10831e-06	1.42083e-07	0	2.98059e-06	2.39974e-06	0	0	5.15219e-06	1.10554e-06	0	0	3.36015e-07	0	0	5.43497e-06	0	0	1.27616e-07	2.86721e-06	0	0	4.50619e-07	0	0	0	5.88471e-07	0	0
K02560	3.6794e-07	0	0	7.53303e-08	2.60151e-07	5.89108e-07	0	5.12759e-07	4.1644e-06	1.14835e-06	7.53685e-06	4.03245e-06	0	0	4.44228e-07	1.30119e-06	1.02789e-07	6.44558e-07	1.48619e-06	1.03549e-07	2.74053e-07	5.68742e-08	7.81693e-08	0	1.46021e-07	1.84279e-06	7.63794e-06	0	0	3.98553e-06	0	0	8.74313e-07	1.10376e-05	0	0	1.05969e-05	3.31138e-07	0	6.84284e-07	7.06819e-08	5.97857e-07	0	7.0593e-06	0	7.8214e-08	2.08783e-07	0	0
K02560|g__Citrobacter.s__Citrobacter_braakii	0	0	0	0	0	0	0	0	0	0	0	0	0	0	0	0	0	0	0	0	0	0	0	0	0	0	0	0	0	0	0	0	0	0	0	0	0	0	0	0	0	0	0	0	0	0	0	0	0
K02560|g__Citrobacter.s__Citrobacter_freundii	0	0	0	0	0	0	0	0	0	0	0	0	0	0	0	0	0	0	0	0	0	0	0	0	0	3.61619e-07	0	0	0	0	0	0	0	0	0	0	0	0	0	0	0	0	0	0	0	0	0	0	0
K02560|g__Citrobacter.s__Citrobacter_portucalensis	0	0	0	0	0	0	0	0	0	0	0	0	0	0	0	0	0	0	0	0	0	0	0	0	0	7.70604e-07	0	0	0	0	0	0	0	0	0	0	0	0	0	0	0	0	0	0	0	0	0	0	0
K02560|g__Citrobacter.s__Citrobacter_youngae	0	0	0	0	0	0	0	0	0	0	0	0	0	0	0	0	0	0	0	0	0	0	0	0	0	2.5409e-07	0	0	0	0	0	0	0	0	0	0	0	0	0	0	0	0	0	0	0	0	0	0	0
K02560|g__Enterobacter.s__Enterobacter_cloacae_complex	0	0	0	0	0	0	0	0	0	0	0	0	0	0	0	0	0	0	0	0	0	0	0	0	0	0	0	0	0	0	0	0	0	0	0	0	0	0	0	0	0	0	0	0	0	0	0	0	0
K02560|g__Escherichia.s__Escherichia_coli	0	0	0	0	0	2.02243e-07	0	3.09521e-07	3.91133e-06	4.97489e-07	6.67416e-06	4.03245e-06	0	0	4.44228e-07	1.30119e-06	0	2.54361e-07	1.31123e-06	0	0	0	0	0	0	4.99592e-08	0	0	0	3.98553e-06	0	0	2.08578e-07	1.10376e-05	0	0	1.05969e-05	3.31138e-07	0	2.60919e-07	0	5.97857e-07	0	2.63645e-06	0	0	0	0	0
K02560|g__Haemophilus.s__Haemophilus_haemolyticus	0	0	0	0	0	0	0	0	0	6.50801e-07	0	0	0	0	0	0	0	0	0	0	0	0	0	0	0	0	0	0	0	0	0	0	0	0	0	0	0	0	0	0	0	0	0	0	0	0	0	0	0
K02560|g__Klebsiella.s__Klebsiella_pneumoniae	3.6794e-07	0	0	0	1.8147e-07	3.272e-07	0	1.02746e-07	0	0	8.08689e-07	0	0	0	0	0	0	0	1.74961e-07	0	2.41721e-07	0	0	0	0	5.16599e-08	0	0	0	0	0	0	4.17157e-07	0	0	0	0	0	0	2.71612e-07	0	0	0	4.42285e-06	0	0	0	0	0
K02560|unclassified	0	0	0	7.53303e-08	7.86816e-08	5.96652e-08	0	1.00492e-07	2.53066e-07	0	5.40051e-08	0	0	0	0	0	1.02789e-07	3.90196e-07	0	1.03549e-07	3.23187e-08	5.68742e-08	7.81693e-08	0	1.46021e-07	3.54816e-07	7.63794e-06	0	0	0	0	0	2.4852e-07	0	0	0	0	0	0	1.51715e-07	7.06819e-08	0	0	0	0	7.8214e-08	2.08783e-07	0	0
[truncated: 26 more columns]
