# Supplementary material for: Fecal microbiota transplantation via capsules relieves ulcerative colitis by improving gut microbiota and serum metabolites
Source: Research Square preprint supplement (doi:10.21203/rs.3.rs-1606914/v1), 2022-05-18
Supplement: Supplementary file 4 [file d258f4301b0276560aa70e92.xlsx]

## Sheet: Diff.kw.fun.metacyc.W0W4.Rm-NRm
Table S4. Relative abundance of the MetaCyc pathways that were significantly different uniquely between W0_Rm and W4_Rm （namely not between W0_NRm and W4_NRm）by paired wilcox test.
	PWY.7219..adenosine.ribonucleotides.de.novo.biosynthesis	PWY.6163..chorismate.biosynthesis.from.3.dehydroquinate	PWY.4242..pantothenate.and.coenzyme.A.biosynthesis.III	PWY.7357..thiamin.formation.from.pyrithiamine.and.oxythiamine..yeast.	PWY.7237..myo...chiro..and.scillo.inositol.degradation	THISYNARA.PWY..superpathway.of.thiamin.diphosphate.biosynthesis.III..eukaryotes.	FASYN.INITIAL.PWY..superpathway.of.fatty.acid.biosynthesis.initiation..E..coli.	PWY0.1479..tRNA.processing	PWY.6895..superpathway.of.thiamin.diphosphate.biosynthesis.II	DAPLYSINESYN.PWY..L.lysine.biosynthesis.I	PWY.5913..TCA.cycle.VI..obligate.autotrophs.	CITRULBIO.PWY..L.citrulline.biosynthesis	PWY.5347..superpathway.of.L.methionine.biosynthesis..transsulfuration.	METSYN.PWY..L.homoserine.and.L.methionine.biosynthesis	PWY.6892..thiazole.biosynthesis.I..E..coli.	NAGLIPASYN.PWY..lipid.IVA.biosynthesis	GLYCOLYSIS.E.D..superpathway.of.glycolysis.and.Entner.Doudoroff	PWY.7117..C4.photosynthetic.carbon.assimilation.cycle..PEPCK.type	FERMENTATION.PWY..mixed.acid.fermentation	P441.PWY..superpathway.of.N.acetylneuraminate.degradation	PWY.5897..superpathway.of.menaquinol.11.biosynthesis	PWY.5898..superpathway.of.menaquinol.12.biosynthesis	PWY.5899..superpathway.of.menaquinol.13.biosynthesis	PWY.5838..superpathway.of.menaquinol.8.biosynthesis.I	GLYCOCAT.PWY..glycogen.degradation.I..bacterial.	COLANSYN.PWY..colanic.acid.building.blocks.biosynthesis	GLYCOLYSIS.TCA.GLYOX.BYPASS	HOMOSER.METSYN.PWY..L.methionine.biosynthesis.I	PYRIDOXSYN.PWY..pyridoxal.5..phosphate.biosynthesis.I	PWY.4041...gamma..glutamyl.cycle	PWY.6629..superpathway.of.L.tryptophan.biosynthesis	PYRIDNUCSAL.PWY..NAD.salvage.pathway.I	PWY.5861..superpathway.of.demethylmenaquinol.8.biosynthesis	PWY.6628..superpathway.of.L.phenylalanine.biosynthesis	PWY.6891..thiazole.biosynthesis.II..Bacillus.	PWY.7323..superpathway.of.GDP.mannose.derived.O.antigen.building.blocks.biosynthesis	PWY.5845..superpathway.of.menaquinol.9.biosynthesis	PWY.5723..Rubisco.shunt	P105.PWY..TCA.cycle.IV..2.oxoglutarate.decarboxylase.	TCA.GLYOX.BYPASS..superpathway.of.glyoxylate.bypass.and.TCA	GALACTARDEG.PWY..D.galactarate.degradation.I	GLUCARGALACTSUPER.PWY..superpathway.of.D.glucarate.and.D.galactarate.degradation	ENTBACSYN.PWY..enterobactin.biosynthesis	PWY.5083..NAD.NADH.phosphorylation.and.dephosphorylation	P161.PWY..acetylene.degradation	PWY4LZ.257..superpathway.of.fermentation..Chlamydomonas.reinhardtii.	PWY.5840..superpathway.of.menaquinol.7.biosynthesis	PWY.561..superpathway.of.glyoxylate.cycle.and.fatty.acid.degradation	PWY0.1298..superpathway.of.pyrimidine.deoxyribonucleosides.degradation
F1W0	1.04636	0.855842	0.865771	0.868154	0.481037	0.596578	0.35663	0.271299	0.0284417	0.462344	0.476896	0.686266	0.271211	0.243387	0.228463	0.0761176	0.204412	0.472838	0.223566	0.19121	0.0065	0.0065	0.0065	0.0074	0.215565	0.253143	0.0417341	0.137765	0.0527698	0.129163	0.00836	0.257767	0.00498	0.0854484	0.00603	0.24489	0.007	0.00601	0.0330528	0.0225636	0.00674	0.00674	0.014792	0.0121585	0.0119887	0.0148365	0.00675	0.026071	0.0244732
F1W4	1.58415	0.724769	0.951256	0.916836	0.789696	0.368085	0.127719	0.0276226	0.0119633	0.00759	0.00884	0.252058	0.100433	0.0876372	0.0867986	0.0342538	0.0725726	0.0127487	0.017156	0.029246	0.00622	0.00622	0.00622	0.00708	0.0113178	0.174553	0.0173408	0.0453533	0.0574515	0.0567434	0	0.00791	0.00473	0	0.00242	0.156292	0.00664	0	0.0175458	0.00954	0.0113674	0.0113674	0	0.0152065	0.00816	0.0101236	0.00636	0.0114613	0.00784
F3W0	0.834388	0.408414	0.595102	0.521727	0.201991	0.406727	0.606976	0.480992	0.467992	0.404545	0.4763	0.244939	0.315724	0.289476	0.413042	0.293728	0.388518	0.424628	0.45651	0.337467	0.393393	0.393393	0.393393	0.391083	0.257803	0.110652	0.287357	0.16814	0.275104	0.151652	0	0.1861	0.319366	0.192195	0.350087	0.0856087	0.193807	0.265437	0.270585	0.257878	0.116046	0.116046	0.216418	0.328669	0.208311	0.22989	0	0.247145	0.213898
F3W4	1.54986	1.2454	0.94048	0.754756	0.798197	0.283726	0.111001	0.237282	0.00843	0.244614	0.235538	0.151833	0.188036	0.164579	0.0521947	0.120242	0.160386	0.151446	0.126435	0.166077	0	0	0	0	0.171253	0.0927549	0	0.0911212	0.0411804	0.0849785	0.00957	0.0479753	0	0.0109342	0.0017	0.0344793	0	0	0	0	0.0915399	0.0915399	0	0.0129709	0.0653722	0.0581913	0	0	0.0137052
F4W0	0.470245	0.330448	0.243167	0.476702	0.245472	0.328306	0.463575	0.360586	0.440553	0.379916	0.599028	0.217353	0.590989	0.577852	0.406021	0.403484	0.357334	0.456549	0.542368	0.397371	0.384394	0.384394	0.384394	0.375353	0.363559	0.227429	0.374798	0.482033	0.320938	0.355766	0.330233	0.188257	0.34417	0.299133	0.374046	0.170803	0.326953	0.463202	0.313089	0.326545	0.521239	0.521239	0.33643	0.28195	0.607785	0.448852	0.326953	0.360564	0.388696
F4W4	1.177	0.78658	0.72196	0.68745	0.660113	0.294427	0.309233	0.236418	0.414947	0.316619	0.314763	0.189162	0.346417	0.319478	0.195972	0.231162	0.259488	0.278488	0.196594	0.162693	0.109247	0.109247	0.109247	0.104173	0.199141	0.134124	0.114419	0.189422	0.0845133	0.135737	0.151976	0.0480944	0.0716239	0.125141	0.135541	0.0923216	0.0698528	0.0695966	0.069177	0.0658698	0.0443333	0.0443333	0.0820416	0.077282	0.0815189	0.0908659	0.0888067	0.0684983	0.0870357
F10W0	1.84595	0.340881	1.08551	1.36652	1.26059	0.614177	0.0256385	0.0704058	0.028612	0.00573	0.0246641	0.0118241	0.00734	0.0063	0.00724	0.0515261	0.0169056	0.0157709	0.0391674	0.0164269	0	0	0	0	0.0113412	0.011559	0.0109913	0.00316	0.00539	0.00861	0	0.0103737	0	0.0108251	0.0058	0.00545	0	0.00353	0.00727	0.00668	0.00225	0.00225	0	0.0129004	0	0	0	0.00556	0.00187
F10W4	1.66366	1.13632	1.11021	1.22773	1.35212	0.492101	0.0738076	0.22747	0.0440761	0.0896452	0.0539427	0.0621731	0.15343	0.148641	0.120085	0.061635	0.146686	0.0617169	0.105907	0.129827	0.0646617	0.0646617	0.0646617	0.0569727	0.0523185	0.0740851	0.0481434	0.0794686	0.0839139	0.073945	0.00709	0.0208674	0.0408676	0.00591	0.00984	0.0491223	0.0250177	0.00217	0.0513007	0.0269354	0.00765	0.00765	0.00822	0.0456477	0.0091	0.0112923	0.0312078	0.0305057	0.0248353
F15W0	1.04535	0.896769	0.934435	0.613266	0.479632	0.580421	0.241161	0.25675	0.27082	0.107566	0.0906239	0.418244	0.161258	0.141731	0.298389	0.479688	0.207118	0.119266	0.092403	0.157563	0.113655	0.113655	0.113655	0.126122	0.0560333	0.256262	0.0790413	0.076189	0.197886	0.141512	0.0590105	0.0845479	0.0875372	0.0621419	0.074417	0.24529	0.0565768	0.0676536	0.0403156	0.0454726	0.0419968	0.0419968	0.0594951	0.0650131	0.0660292	0.076883	0.0773151	0.0451218	0.0856486
F15W4	1.50095	0.97557	0.843702	0.822313	1.12828	0.204374	0.227501	0.213965	0.0670053	0.0785781	0.0403431	0.263691	0.0652692	0.0564583	0.111664	0.187698	0.0962245	0.0526487	0.0497011	0.0545982	0.0368379	0.0368379	0.0368379	0.0391165	0.0315901	0.0986959	0.0398784	0.029015	0.0972845	0.0308591	0.0104499	0.0103868	0.0262667	0.013913	0.0141099	0.0906625	0.0204014	0.00366	0.0304262	0.022783	0.00603	0.00603	0.0203291	0.0584005	0.0047	0.00582	0.0236121	0.0259456	0.00526
F16W0	1.01001	0.828796	0.728499	0.561171	0.268587	0.529185	0.359827	0.302067	0.455414	0.223826	0.207594	0.369937	0.259684	0.234805	0.420376	0.363021	0.245194	0.23672	0.218105	0.205342	0.26678	0.26678	0.26678	0.27415	0.140697	0.220727	0.191311	0.134137	0.378338	0.180146	0.243649	0.178587	0.208943	0.180998	0.191341	0.192794	0.267491	0.0880893	0.197518	0.130781	0.0914205	0.0914205	0.105258	0.102954	0.0938974	0.0814779	0.196943	0.138677	0.100442
F16W4	1.56522	1.05865	0.969847	0.454822	0.379515	0.276933	0.260735	0.163268	0.267591	0.170514	0.128606	0.302296	0.155771	0.138772	0.235721	0.0980455	0.178797	0.133345	0.156111	0.133767	0.115385	0.115385	0.115385	0.116763	0.104156	0.160469	0.115035	0.073567	0.0740403	0.112599	0.158299	0.0863283	0.0806306	0.126142	0.0768529	0.136865	0.0787361	0.0516088	0.123105	0.0714008	0.0461778	0.0461778	0.101806	0.0493479	0.0546092	0.065389	0.0787361	0.0708866	0.0618474
F19W0	1.09964	0.886715	0.532551	0.725649	0.285971	0.250102	0.325526	0.668192	0.370016	0.518723	0.218046	0.157786	0.24316	0.452108	0.185341	0.327005	0.264599	0.209832	0.072692	0.286439	0.1326	0.1326	0.1326	0.139599	0.175679	0.125561	0.229207	0.305859	0.0740922	0.213224	0.201107	0.250567	0.109047	0.239949	0.158714	0.0995198	0.0959357	0.145785	0.0300792	0.142966	0.132505	0.132505	0.15894	0.104852	0.16812	0.188927	0.132811	0.0361524	0.147825
F19W4	2.12162	1.2631	0.573625	1.1038	1.57935	0.136587	0.00743	0.032779	0.0301549	0.0190034	0.012725	0.00341	0.0112877	0.00969	0.0144106	0.0648163	0.0191049	0.00929	0.0101353	0.00248	0	0	0	0	0.00454	0.00256	0.0102276	0.00488	0.00567	0	0	0.00399	0	0	0.00614	0	0	0	0.00661	0.00757	0.00389	0.00389	0	0.00353	0.00243	0.00237	0	0.00364	0.00362
F20W0	0.730149	0.530242	0.625786	0.447731	0.18309	0.382717	0.708232	0.462181	0.477722	0.441496	0.469175	0.281316	0.42391	0.413161	0.416334	0.304544	0.351232	0.30453	0.395505	0.421283	0.335908	0.335908	0.335908	0.350988	0.271943	0.219294	0.320059	0.269418	0.271755	0.294314	0.241936	0.301034	0.312497	0.289543	0.2242	0.170834	0.212266	0.270911	0.18162	0.226695	0.293285	0.293285	0.242901	0.214983	0.081722	0.0966203	0.212266	0.218933	0.135421
F20W4	1.326	0.921334	0.803422	0.706823	0.649679	0.449437	0.516012	0.250225	0.31722	0.231039	0.220006	0.110134	0.230128	0.206607	0.189169	0.130382	0.208918	0.158998	0.222719	0.232224	0.231321	0.231321	0.231321	0.222255	0.0734543	0.115795	0.164756	0.115932	0.102423	0.0997222	0.110273	0.169781	0.158261	0.177365	0.0897267	0.084668	0.0295191	0.105732	0.0796015	0.0994375	0.126169	0.126169	0.143361	0.0932381	0.0246643	0.0304026	0.0487505	0.0847539	0.0792827
F21W0	1.11088	0.787924	0.406045	0.553169	1.06799	0.320696	0.321006	0.359743	0.419567	0.255744	0.31595	0.136465	0.238556	0.212041	0.230133	0.238399	0.244132	0.295514	0.2934	0.209159	0.357131	0.357131	0.357131	0.320434	0.211842	0.10578	0.246613	0.129144	0.168566	0.173242	0.437106	0.167441	0.232306	0.150603	0.17445	0.0896941	0.237069	0.127696	0.149423	0.167192	0.143349	0.143349	0.129378	0.127305	0.107753	0.128453	0.237069	0.142474	0.120624
F21W4	1.37229	0.721656	0.623335	0.728047	0.950928	0.359068	0.310882	0.222514	0.413731	0.166642	0.167695	0.142298	0.159835	0.140503	0.219334	0.165679	0.19244	0.168306	0.188886	0.179472	0.204823	0.204823	0.204823	0.1927	0.14403	0.11025	0.17397	0.0761442	0.118116	0.125466	0.296382	0.140715	0.135149	0.162671	0.135057	0.0775363	0.162041	0.0807507	0.149265	0.119156	0.0526831	0.0526831	0.0983452	0.0839988	0.0863436	0.0967202	0.162041	0.109154	0.0895377
[truncated: 49 more columns]
