# Supplementary material for: Fecal microbiota transplantation via capsules relieves ulcerative colitis by improving gut microbiota and serum metabolites
Source: Research Square preprint supplement (doi:10.21203/rs.3.rs-1606914/v1), 2022-05-18
Supplement: Supplementary file 5 [file da4a2e09ddc63321f670af27.xlsx]

## Sheet: Diff.kw.fun.modulec.W0W4.Rm-NRm
Table S3. Relative abundance of the KEGG modules that were significantly different uniquely between W0_Rm and W4_Rm （namely not between W0_NRm and W4_NRm）by paired wilcox test.
	M00003..Gluconeogenesis..oxaloacetate....fructose.6P	M00124..Pyridoxal.biosynthesis..erythrose.4P....pyridoxal.5P	M00060..Lipopolysaccharide.biosynthesis..KDO2.lipid.A	M00036..Leucine.degradation..leucine....acetoacetate...acetyl.CoA	M00116..Menaquinone.biosynthesis..chorismate....menaquinone	M00224..Putative.phosphonate.transport.system	M00185..Sulfate.transport.system	M00208..Glycine.betaine.proline.transport.system	M00227..Glutamine.transport.system	M00283..PTS.system..ascorbate.specific.II.component	M00270..PTS.system..trehalose.specific.II.component	M00229..Arginine.transport.system	M00226..Histidine.transport.system	M00215..D.Xylose.transport.system	M00280..PTS.system..glucitol.sorbitol.specific.II.component	M00348..Glutathione.transport.system	M00225..Lysine.arginine.ornithine.transport.system	M00274..PTS.system..mannitol.specific.II.component	M00303..PTS.system..N.acetylmuramic.acid.specific.II.component	M00154..Complex.IV..Cytochrome.c.oxidase...cytochrome.c.oxidase	M00332..Type.III.secretion.system	Group
F1W0	0.385845	0.369401	0.32527	0.050831	0.201689	0.00551	0.0140317	0.225482	0.000578	0.00814	0.0327802	0.00116	0.0016	0	0.0103853	0.0011	0	0.00365	0.0328409	8.3e-05	0	W0_Rm
F1W4	0.385978	0.251096	0.224273	0.23904	0.119616	0.00702	0.00336	0.158099	0	0	0	0	0	0	0.00206	0	0	0	0	0	0.00141	W4_Rm
F3W0	0.46928	0.345649	0.375087	0	0.330654	0.401355	0.159998	0.111391	0.267295	0.0499211	0.0995826	0.0385152	0.138658	0.0300168	0.198111	0.0702837	0	0.0874995	0	0	0	W0_Rm
F3W4	0.544218	0.217933	0.0788734	0.770311	0.0681902	0	0.00156	0.0135629	0	0.00685	0	0.00645	0	0	0	0	0	0	0	0	0	W4_Rm
F4W0	0.23906	0.312975	0.206599	0	0.312628	0.566133	0.3123	0.058396	0.228964	0.203399	0.135871	0.15034	0.115341	0.073755	0.143857	0.197584	0.115341	0.0922089	0.0166953	0.0181985	0	W0_Rm
F4W4	0.458168	0.259764	0.159027	0	0.117622	0.11841	0.103363	0.0347352	0.0327543	0.0470607	0	0.0473863	0.0439904	0.0196666	0.0276739	0.0331287	0.0481936	0.023927	0.00913	0.00659	0.00308	W4_Rm
F10W0	0.488395	0.0134025	0.0108731	0	0.00977	0.00168	0	0.0107808	0	0	0	0	0	0	0	0	0	0	0	0	0	W0_Rm
F10W4	0.478268	0.102931	0.0772317	0.082208	0.0728424	0.000871	0.00546	0.0146868	0	0.0156709	0	0.0177022	0	0	0.00673	0.000756	0	0.0057	0	0.00112	0.000902	W4_Rm
F15W0	0.400876	0.350145	0.337622	0.145125	0.169425	0.0172341	0.0243206	0.221561	0.010465	0.0279103	0.0274394	0.0165483	0.0133145	0.016504	0.00757	0.0159913	0.0133145	0.0211496	0.0239917	0.00154	0	W0_Rm
F15W4	0.402086	0.256791	0.267762	0.742331	0.141263	0.000816	0.0135387	0.0657076	0.00362	0	0	0.0160106	0	0.00144	0	0	0.00264	0	0	0.000247	0.00376	W4_Rm
F16W0	0.444921	0.340399	0.344057	0.0612922	0.208409	0.0242398	0.0490827	0.185559	0.00385	0.0256502	0.0875442	0.0463318	0.0241014	0.036834	0.000351	0.0323365	0.0241014	0.0171342	0.076977	0.00381	0.00414	W0_Rm
F16W4	0.576453	0.186325	0.191656	0.228059	0.0793616	0.026898	0.0460354	0.0149914	0.00765	0.0100459	0.0247282	0.034554	0.02338	0.0325205	0.0102556	0.0241728	0.02338	0.0170071	0.0123818	0.00295	0.010389	W4_Rm
F19W0	0.4262	0.230943	0.053585	0	0.0803371	0.00807	0.0539524	0.0406232	0.0216495	0.0522442	0.0636673	0.0288254	0.0514215	0.0280125	0.0368715	0.0336624	0.0514215	0.0747675	0.0319607	0.00419	0	W0_Rm
F19W4	0.448113	0.0360799	0.00542	0	0.0122907	0	0.0313192	0.0073	0	0	0	0	0	0	0	0.00655	0	0.00867	0	0	0	W4_Rm
F20W0	0.439018	0.206744	0.123705	0.0252424	0.178811	0.585605	0.202934	0.0281431	0.202989	0.17016	0.119475	0.0746843	0.102981	0.0586933	0.114919	0.0813134	0.0710307	0.0238814	0	0.00724	0.000235	W0_Rm
F20W4	0.439376	0.130806	0.064986	0	0.120813	0.269142	0.104638	0.0182018	0.130174	0.123966	0.040587	0.0410544	0.0584425	0.032613	0.0651937	0.0426367	0.038366	0.0165984	0	0.00379	0	W4_Rm
F21W0	0.331291	0.297933	0.226614	0	0.229464	0.0873118	0.190406	0.0219555	0.0135563	0.0580772	0.111573	0.178124	0.121061	0.274251	0.0182205	0.0468517	0.121061	0.0678347	0.0667695	0.0161557	0	W0_Rm
F21W4	0.43472	0.221301	0.222238	0.75309	0.159371	0.0582789	0.0921667	0.0256191	0.0100888	0.0331505	0.0689915	0.0969044	0.0500166	0.111512	0.00636	0.0266046	0.0500166	0.0249895	0.0350288	0.00896	0.00266	W4_Rm
