# Supplementary material for: Fecal microbiota transplantation via capsules relieves ulcerative colitis by improving gut microbiota and serum metabolites
Source: Research Square preprint supplement (doi:10.21203/rs.3.rs-1606914/v1), 2022-05-18
Supplement: Supplementary file 6 [file dfe2c7a35b5acd31dfd5a935.xlsx]

## Sheet: Sheet1
Table S1. PERMANOVA on gut bacterial commubities after FMT.
		Rm			NRm			Rm vs NRm
		W0_W1	W0_W4	W0_W12	W0_W1	W0_W4	W0_W12	W0	W1	W4	W12
16S	F	1.7603	1.926	1.3338	0.8365	1.0236	1.8293	0.7652	1.0394	1.9497	1.2854
	P	0.0384	0.034	0.1558	0.6861	0.4239	0.011	0.787	0.429	0.017	0.187
Metagenomics	F	2.2338	2.3759	1.0264	1.0028	0.98378	1.6537	0.36079	2.2894	2.1339	1.0176
	P	0.0098	0.0058	0.3975	0.3991	0.4148	0.0788	0.999	0.007	0.026	0.45
		Rm			NRm				Rm vs NRm
		W0_W1	W0_W4	W0_W12	W0_W1	W0_W4	W0_W12	W0	W1	W4	W12
16S	F	1.7603	1.926	1.3338	0.8365	1.0236	1.8293	0.7652	1.0394	1.9497	1.2854
	P	0.0384	0.034	0.1558	0.6861	0.4239	0.011	0.787	0.429	0.017	0.187
Metagenomics	F	2.2338	2.3759	1.0264	1.0028	0.98378	1.6537	0.36079	2.2894	2.1339	1.0176
	P	0.0098	0.0058	0.3975	0.3991	0.4148	0.0788	0.999	0.007	0.026	0.45
