# Supplementary material for: Fecal microbiota transplantation via capsules relieves ulcerative colitis by improving gut microbiota and serum metabolites
Source: Research Square preprint supplement (doi:10.21203/rs.3.rs-1606914/v1), 2022-05-18
Supplement: Supplementary file 7 [file ff8127e326f2fdabfb0e1795.xlsx]

## Sheet: Table S6A
Table S6 Relative abundances of metabolites in positive ion model (A) and negative ion module (B) that were significantly different between baseline and sample after FMT.
	POS80	POS1807	POS4845	POS326	POS1212	POS2601	POS4847	POS2820	POS2599	POS1808	POS4554	POS5204	POS5685	POS5911	POS1781	POS6045	POS3385	POS1327	POS5691	POS2559	POS6755	POS1458	POS4843	POS106	POS5027	POS2600	POS1006	POS3751	POS87	POS3012	POS2648	POS5111	POS437	POS1211	POS4547	POS2832	POS4838	POS373	POS4852	POS2357	POS6238	POS4323	POS2469	POS4155	POS4366	POS3386	POS1147	POS479	POS4851
F1W0	1.13345	0.595676	0.495583	0.14616	0.182392	0.24165	0.134071	0.102495	0.136132	0.115658	2.90893e-06	0.123279	0.0688606	0.0260271	0.0644523	0.0396171	0.0327893	0.0447643	0.0435153	0.0609984	0.0449836	0.0316529	0.0577078	0.0426777	0.00549383	0.0432983	0.0249496	0.0331792	0.0282295	0.02098	0.0452925	0.0222416	0.01189	0.020597	2.90893e-06	0.0115468	0.0197703	0.012463	0.0163575	0.0110636	0.00186027	2.48083e-05	0.011397	2.90893e-06	0.000953173	0.00510414	0.00453544	0.00618676	0.00941138
F1W1	0.712962	0.289069	0.280691	0.120706	0.291655	0.154124	0.0852	0.117555	0.0824112	0.0555585	2.62029e-06	0.0495756	0.0667937	0.0710812	0.047114	0.0723841	0.0503554	0.0752917	0.0520757	0.0306786	0.0387748	0.0246893	0.0332064	0.0338818	0.00457636	0.0261075	0.0390812	0.026003	0.0296944	0.0220541	0.0266112	0.0219953	0.00772772	0.0224855	2.78941e-05	0.0119891	0.0132321	0.00762776	0.00898066	0.00970412	0.0868519	2.62029e-06	0.00827697	1.62088e-05	2.66655e-05	0.00833838	0.00740712	0.00648589	0.00570332
F1W12	0.931389	0.145336	0.380833	0.178308	0.247065	0.200231	0.105811	0.0986471	0.111749	0.0265615	2.23925e-06	0.0333497	0.074098	0.171906	0.055327	0.0516168	0.0764636	0.0570094	0.0410469	0.0477826	0.0288674	0.0379966	0.0445016	0.0134748	0.00307385	0.0350616	0.010858	0.0189163	0.0258802	0.0257121	0.0209239	0.0212146	0.0193469	0.0203095	2.23925e-06	0.0145621	0.0164338	0.0058581	0.0118567	0.0123337	0.0473712	2.23925e-06	0.0097687	2.23925e-06	2.23925e-06	0.0125583	0.00854533	0.00664675	0.00683859
F1W4	0.757086	0.207641	0.312104	0.10984	0.241573	0.142713	0.0849071	0.0831976	0.0790971	0.038409	1.49833e-05	0.0514459	0.0596128	0.17569	0.0476926	0.0912687	0.0780757	0.0532091	0.0373537	0.0529486	0.0289702	0.0228365	0.0350918	0.0207417	0.0038941	0.0246249	0.0250843	0.0213158	0.0260748	0.0229394	0.0213398	0.0210078	0.00756547	0.0212058	3.56315e-05	0.0132371	0.0137484	0.00469465	0.00953395	0.00842825	0.050211	7.39187e-05	0.00791984	2.37293e-06	2.37293e-06	0.0124554	0.00544017	0.00501652	0.00507047
F2W0	0.893283	0.223463	0.391783	0.153233	0.294507	0.22458	0.112958	0.132711	0.121555	0.0414482	3.1224e-05	0.111736	0.0823133	0.0475336	0.13038	0.0432062	0.0401099	0.0837232	0.0515157	0.0609143	0.0631918	0.0305058	0.0435365	0.0196918	0.00365304	0.0372662	0.0446157	0.0333607	0.0300292	0.0754269	0.0241984	0.014044	0.02781	0.0248218	0.000200747	0.0366691	0.0171223	0.00985751	0.0121391	0.0288202	0.00126154	2.82708e-06	0.00970696	2.82708e-06	2.59235e-05	0.0061977	0.00795179	0.0101443	0.00719366
F2W1	1.00225	0.285598	0.41354	0.282409	0.257423	0.200956	0.118758	0.0684313	0.101246	0.0539095	2.22246e-06	0.037225	0.065359	0.128651	0.0444084	0.0672431	0.076441	0.0778481	0.0525281	0.0534447	0.0354458	0.0585792	0.0470036	0.0305838	0.00453758	0.0323015	0.0226237	0.0269488	0.0265542	0.0347845	0.0246601	0.0285068	0.0285657	0.0176346	2.22246e-06	0.0274001	0.0176262	0.0141436	0.0127938	0.0150011	0.0305709	3.64772e-05	0.0112734	2.24136e-05	0.000183015	0.0121169	0.016815	0.0112002	0.00781292
F2W12	1.97068	0.285904	0.864903	0.257526	0.132688	0.239839	0.232875	0.0960188	0.135522	0.0548572	4.27015e-05	0.109149	0.152768	0.0545274	0.0412816	0.059436	0.075654	0.0375674	0.0996567	0.0542088	0.0322975	0.0563059	0.101358	0.0255639	0.00409778	0.0411628	0.0314061	0.0262406	0.0243921	0.0442783	0.0233908	0.02486	0.0263877	0.0136823	2.69334e-06	0.0405288	0.0345543	0.011144	0.0286239	0.0271947	0.00187929	2.69334e-06	0.0126771	2.69334e-06	1.88233e-05	0.0127386	0.00732109	0.0120196	0.0169862
F2W4	0.978857	0.351618	0.399738	0.273696	0.27485	0.119024	0.112377	0.102577	0.0665866	0.0642811	0.000153051	0.0532124	0.0789673	0.117599	0.0484219	0.0423841	0.111809	0.0588942	0.0584923	0.0555398	0.0311404	0.0581463	0.0464974	0.0441106	0.00530129	0.0202258	0.0296471	0.021304	0.0283348	0.0352266	0.0207583	0.0189487	0.0160638	0.00792505	0.000583381	0.0266176	0.0172523	0.0119158	0.0124253	0.0163788	0.0216953	4.33692e-05	0.0099101	0.000599282	0.000143806	0.0179604	0.0172719	0.00555265	0.00732998
F3W0	0.914938	0.343642	0.365067	0.0628408	0.326652	0.11102	0.107606	0.156689	0.055855	0.0634394	4.0683e-05	0.0869408	0.101434	0.0214595	0.129088	0.104361	0.094502	0.100481	0.0768954	0.091722	0.0818959	0.0135717	0.0415136	0.0357235	0.00563497	0.0164205	0.045172	0.0489451	0.0537214	0.00939668	0.0441638	0.021443	0.0221245	0.0212394	2.01305e-05	0.0112405	0.0161614	0.00334922	0.0112302	0.0130818	0.00725374	0.000116992	0.00731648	1.81007e-05	2.52373e-05	0.0162736	0.0023016	0.00964808	0.00733908
F3W12	0.994246	0.164918	0.440087	0.297383	0.148472	0.157834	0.116231	0.0898873	0.0880561	0.0308429	2.28608e-06	0.098552	0.0721956	0.135418	0.0691295	0.0843543	0.0651694	0.0681605	0.0513426	0.0497252	0.0439854	0.0640777	0.0497303	0.0134669	0.00480032	0.0265875	0.0157158	0.0188394	0.0167452	0.0217779	0.0189012	0.0166858	0.0101732	0.0138789	2.28608e-06	0.0142639	0.0186817	0.0229423	0.0136376	0.012648	0.0377835	2.28608e-06	0.0142224	2.28608e-06	2.28608e-06	0.0104054	0.0111282	0.0055863	0.00791101
F3W4	0.746042	0.727232	0.320243	0.111216	0.224612	0.183119	0.0882135	0.0901325	0.100879	0.139253	1.74716e-05	0.0823325	0.076963	0.150971	0.0567703	0.102935	0.0676298	0.0716332	0.0512095	0.0493089	0.0568909	0.0227473	0.0360014	0.065196	0.00389034	0.0304923	0.0125207	0.022735	0.0253884	0.0161519	0.0186381	0.0227486	0.0321595	0.0210249	3.40017e-05	0.0205431	0.0135725	0.00905286	0.0101139	0.015689	0.0415918	2.25694e-06	0.0244658	5.78822e-05	2.25694e-06	0.0106335	0.00534165	0.00845068	0.00560012
F4W0	1.15302	0.255543	0.517921	0.362137	0.144252	0.154259	0.136423	0.0886976	0.0861149	0.0472608	2.82404e-05	0.103316	0.10717	0.135948	0.0718939	0.0625626	0.0937868	0.0478942	0.0690448	0.0535677	0.0487144	0.0773024	0.0598749	0.0236381	0.00482953	0.0272021	0.0290871	0.0225161	0.0154502	0.026387	0.0212651	0.0162603	0.00883078	0.014087	5.93179e-05	0.024626	0.0214688	0.0161555	0.0171098	0.0111526	0.0259595	2.39755e-06	0.00840681	2.39755e-06	2.39755e-06	0.0154573	0.0146621	0.00638288	0.00979921
F4W1	1.54599	0.245774	0.621939	0.103223	0.33765	0.228067	0.187612	0.124673	0.124604	0.0479729	2.96063e-06	0.0682944	0.121485	0.0596005	0.0419221	0.193352	0.115108	0.0889132	0.0890461	0.0627338	0.103714	0.0216323	0.0730312	0.0308342	0.00669415	0.0388999	0.0267463	0.0269091	0.0328856	0.0511143	0.0296491	0.0291164	0.0329625	0.0263973	0.000225067	0.0352767	0.0271046	0.00465836	0.0202139	0.0156828	0.00171738	2.96063e-06	0.0258972	0.000219046	4.38471e-05	0.0186603	0.0054811	0.0138442	0.012458
F4W12	0.900844	0.227649	0.393171	0.214257	0.277861	0.0270492	0.108124	0.274129	0.0146025	0.0421287	1.98633e-05	0.0870087	0.0762164	0.0375384	0.194763	0.0462781	0.0453469	0.0587881	0.061274	0.00668835	0.0566379	0.0450233	0.0450412	0.020239	0.00339383	0.0042845	0.028529	0.0321655	0.0344056	0.00654337	0.0297052	0.0274092	0.00571831	0.0374477	5.95346e-05	0.00436318	0.0171368	0.00805212	0.0121794	0.00244703	0.00496347	3.08304e-06	0.002128	7.80507e-05	3.08304e-06	0.00725364	0.00786328	0.00254224	0.00714242
F4W4	1.15674	0.406326	0.492594	0.128043	0.305237	0.213207	0.133298	0.126837	0.119054	0.0755022	4.59027e-05	0.0853026	0.0964643	0.0454889	0.0832687	0.0948276	0.030215	0.049971	0.069628	0.0601952	0.0770349	0.0266783	0.0569325	0.0434122	0.00395292	0.0369221	0.0259708	0.0290252	0.0317467	0.045558	0.0263513	0.0220324	0.0327292	0.0263501	9.08375e-05	0.0269513	0.0213129	0.00717827	0.0156744	0.0225149	0.00175633	2.83585e-06	0.0183258	1.11074e-05	1.55649e-05	0.00473068	0.0060166	0.0135553	0.00917632
F5W0	0.323713	0.17124	0.131344	0.0953871	0.208779	0.0730528	0.0359891	0.124814	0.0368934	0.031934	0.792371	0.0419632	0.0446126	0.0139944	0.082716	0.0487858	0.0223145	0.059363	0.0405121	0.0564725	0.079336	0.0194909	0.0140335	0.0188352	0.422574	0.0113735	0.0283646	0.0301956	0.0203114	0.00631572	0.0291763	0.0103182	0.0159239	0.0148485	0.285598	0.00853054	0.00656342	0.00420403	0.0033405	0.00637072	0.00122799	0.10769	0.00418264	0.1998	0.16618	0.00379792	0.00478998	0.00787537	0.00178274
F5W1	0.418922	0.188928	0.178798	0.212481	0.0425348	0.0620412	0.0492539	0.0493707	0.0341567	0.0366231	2.33428	0.0494965	0.0335224	0.0166839	0.0212005	0.0373884	0.0146284	0.0170577	0.0284972	0.0253585	0.0121443	0.0467554	0.0204092	0.0137445	0.656969	0.0106166	0.0152468	0.00999894	0.0107384	0.0182265	0.0107986	0.0087063	0.0128866	0.00871229	0.297163	0.0125849	0.00691405	0.023088	0.0051642	0.00721578	0.000733565	0.318639	0.00486286	0.232309	0.241638	0.00222862	0.0108419	0.0050035	0.00350386
F7W0	0.863712	1.42605	0.37517	0.293873	0.311573	0.193152	0.108353	0.131412	0.103478	0.273324	2.89432e-06	0.0957772	0.0740204	0.0418253	0.120211	0.0666575	0.0503917	0.0840856	0.0548073	0.0677581	0.0444838	0.0594796	0.0428876	0.11345	0.00553488	0.0319	0.0603675	0.0350595	0.0400182	0.0163104	0.0274812	0.0279768	0.0124715	0.0295931	2.89432e-06	0.0128523	0.0157355	0.0260719	0.0120484	0.00901605	0.001452	1.85505e-05	0.00802566	0.000104738	7.94223e-05	0.0079857	0.0113403	0.0059535	0.00724606
F7W1	0.806756	0.271107	0.324155	0.253678	0.286315	0.0452125	0.0981526	0.0135002	0.0238715	0.0522136	2.51754e-06	0.0501914	0.0865707	0.168774	0.0457542	0.038291	0.0832768	0.0801676	0.0558233	0.062002	0.0404748	0.0510143	0.0374788	0.0328125	0.00450411	0.00512824	0.0128545	0.0276629	0.0291907	0.00683531	0.0272247	0.0421868	0.00744197	0.0207922	2.51754e-06	0.00668428	0.014936	0.0135945	0.0100743	0.00354614	0.0359129	6.59824e-05	0.00407544	2.51754e-06	2.51754e-06	0.0129363	0.0161119	0.00421418	0.00635008
F7W12	1.55786	0.248817	0.681915	0.357515	0.15581	0.23268	0.186608	0.0773355	0.128658	0.0472051	2.63287e-06	0.114918	0.127634	0.0501126	0.0491273	0.0526883	0.0606144	0.0702165	0.0756524	0.0545921	0.0453079	0.0781053	0.0801518	0.0190885	0.00411235	0.0399572	0.0169582	0.0285459	0.0272269	0.0476694	0.0220944	0.0512945	0.045019	0.0174761	1.32409e-05	0.0295243	0.0270633	0.0212954	0.022169	0.0182587	0.00159668	2.63287e-06	0.0152068	2.63287e-06	2.63287e-06	0.00983972	0.0127841	0.010009	0.0138043
F7W4	0.696245	0.691017	0.309796	0.337907	0.133256	0.168097	0.079747	0.102032	0.0930402	0.12968	2.38856e-06	0.094865	0.0873266	0.187194	0.0422605	0.0348147	0.0696827	0.0470103	0.0496155	0.0514624	0.0397276	0.0719669	0.0357435	0.0529195	0.00408082	0.0279787	0.0245741	0.0214913	0.0150279	0.0167693	0.0203539	0.0320004	0.03789	0.0153824	2.38856e-06	0.0232448	0.012936	0.0172924	0.00967799	0.0169716	0.0480977	2.38856e-06	0.00742562	2.38856e-06	2.38856e-06	0.0112412	0.0110081	0.0063641	0.00534245
F8W0	0.399524	0.158944	0.172593	0.0690012	0.123009	0.11802	0.049267	0.0623875	0.062901	0.0299587	1.67859	0.0587541	0.0287375	0.0073431	0.0731989	0.0419133	0.0186737	0.060507	0.0266174	0.0322194	0.0355331	0.0137979	0.0192158	0.0123032	0.498618	0.0189887	0.0123337	0.0175588	0.012564	0.00458138	0.0120907	0.0163929	0.00947532	0.0135754	0.398627	0.00432069	0.0170991	0.0035338	0.00546051	0.00440013	0.000789629	0.248235	0.0122115	0.214417	0.211697	0.00276057	0.00185592	0.00595259	0.00337283
F8W1	0.525446	2.16341	0.233784	0.369524	0.162754	0.167191	0.0644903	0.107225	0.0904321	0.412542	1.76407e-05	0.0859085	0.0652741	0.138178	0.0396958	0.0562777	0.102925	0.0473734	0.0550618	0.0498408	0.0263618	0.0775611	0.0259901	0.194126	0.00466767	0.0279436	0.0427833	0.0168489	0.0218919	0.0084008	0.0199339	0.0209324	0.0102248	0.00979891	9.67727e-05	0.00768258	0.00898806	0.0310693	0.00730154	0.00700663	0.0361153	2.17879e-06	0.0242837	1.20006e-05	2.17879e-06	0.017009	0.0178108	0.0101142	0.00426839
F8W12	1.02095	0.322857	0.45258	0.352083	0.187822	0.153287	0.118414	0.108902	0.0845824	0.0601785	2.98286e-06	0.133658	0.0868626	0.0218404	0.0621142	0.0475369	0.133285	0.0466415	0.0822764	0.0612393	0.0311532	0.0765081	0.0516264	0.0230721	0.00462553	0.0256205	0.0269309	0.0296262	0.0271242	0.00965843	0.0273574	0.0213915	0.0137341	0.0104405	2.98286e-06	0.0108442	0.0188264	0.0139109	0.014791	0.0107719	0.00269443	2.98286e-06	0.0203876	2.98286e-06	0.000162072	0.0216324	0.0122873	0.0088837	0.00818279
F8W4	0.652109	0.621005	0.253132	0.209512	0.266742	0.220952	0.0762308	0.074226	0.112335	0.116327	2.35423e-06	0.0428454	0.0614632	0.167165	0.0754371	0.0680017	0.128785	0.0762065	0.03997	0.0697355	0.0385867	0.0439007	0.0293117	0.0574259	0.005269	0.0342475	0.0496165	0.038676	0.0294254	0.0116928	0.0359968	0.0185044	0.0233134	0.0178928	1.50985e-05	0.0131464	0.0318404	0.00962721	0.00746426	0.0171414	0.0439494	2.35423e-06	0.0328625	4.0924e-05	2.61255e-05	0.0209806	0.012294	0.0124128	0.00478328
F9W0	0.862764	0.178645	0.361771	0.172965	0.317151	0.149473	0.0981201	0.125884	0.0839835	0.0325771	7.32163e-05	0.0717333	0.0834618	0.0174912	0.0764823	0.0590945	0.0440083	0.0904686	0.071653	0.060488	0.0914049	0.0369325	0.0412444	0.0280392	0.00771788	0.0255686	0.0377161	0.0294461	0.0326621	0.011209	0.0253887	0.0188614	0.00906393	0.0287618	9.71587e-05	0.0104205	0.0157728	0.0107097	0.0119302	0.0103005	0.00225564	2.97261e-06	0.00935923	1.48826e-05	3.4028e-05	0.00724908	0.00916289	0.00792926	0.00638706
F9W1	1.49142	0.261254	0.643806	0.272436	0.126657	0.242186	0.180962	0.0655874	0.132916	0.0503729	2.29709e-06	0.206562	0.105258	0.171177	0.0469026	0.0775295	0.105302	0.0385094	0.0684147	0.0454731	0.030702	0.0588455	0.0735148	0.0201324	0.00411454	0.0424018	0.0225413	0.0191986	0.0100419	0.0316493	0.0182279	0.0160343	0.027875	0.0139776	2.29709e-06	0.0240399	0.0266585	0.010444	0.0211083	0.0162114	0.0502113	2.29709e-06	0.0133525	2.29709e-06	2.29709e-06	0.0177415	0.00956289	0.0109587	0.0135159
F9W12	1.69714	0.370571	0.75128	0.32949	0.150677	0.3146	0.202054	0.105104	0.174474	0.0728354	2.87193e-06	0.124403	0.124117	0.0401549	0.0525714	0.0509746	0.0651697	0.0421192	0.111913	0.058233	0.0466272	0.072963	0.0882138	0.0259163	0.00885961	0.052214	0.0289236	0.0320969	0.0254902	0.0454399	0.0234501	0.024222	0.0308007	0.0128874	1.48322e-05	0.0335705	0.0300575	0.0205233	0.0245463	0.0249552	0.0113795	2.87193e-06	0.0197265	2.87193e-06	0.000762465	0.0101774	0.0112434	0.0103617	0.0149258
F9W4	1.23395	0.472608	0.549685	0.526362	0.0454435	0.13511	0.144316	0.0801999	0.0756778	0.0907917	2.36845e-06	0.103771	0.12999	0.17792	0.0451933	0.0487182	0.0785837	0.0656845	0.0765223	0.0531205	0.0482187	0.114001	0.0634076	0.0316947	0.00814274	0.023391	0.0233608	0.0196138	0.0196251	0.029287	0.0237005	0.0192868	0.0137925	0.0173504	1.35054e-05	0.0264692	0.0220642	0.0208582	0.0175416	0.0132502	0.0548396	2.36845e-06	0.00944284	2.36845e-06	4.62437e-05	0.0128773	0.0181513	0.00728154	0.0099783
F10W0	0.806796	0.0927097	0.326763	0.283968	0.268763	0.176406	0.0909836	0.0350001	0.0899577	0.0172905	3.79024e-05	0.0322425	0.0647011	0.131128	0.0497342	0.0438611	0.0684953	0.0553541	0.0561635	0.0581446	0.0339117	0.0601221	0.0374642	0.00986775	0.00799749	0.0278803	0.0396682	0.0309332	0.0462285	0.0154827	0.0276327	0.0263439	0.033352	0.0185901	2.0154e-05	0.0137328	0.0138693	0.00730625	0.00992976	0.0116969	0.032208	2.29926e-06	0.00925524	2.15794e-05	5.19293e-05	0.0109958	0.0142377	0.00807138	0.00590424
F10W1	0.989691	0.186693	0.395683	0.128313	0.358984	0.185037	0.117951	0.147757	0.103671	0.0348109	3.2337e-06	0.0930303	0.109646	0.026485	0.0826967	0.0650753	0.0379601	0.0853316	0.0752479	0.0685703	0.0916501	0.0276795	0.0460181	0.0203662	0.00831287	0.031753	0.037633	0.0319071	0.0252922	0.0222483	0.0327538	0.0277254	0.032551	0.0268059	3.71873e-05	0.019108	0.0177086	0.00533553	0.0123626	0.0130513	0.00296771	3.2337e-06	0.00944433	0.000141288	4.27391e-05	0.00673918	0.00590065	0.0102112	0.00790064
F10W4	0.94406	0.182881	0.417253	0.103362	0.173729	0.18963	0.117344	0.0977396	0.103269	0.0348353	1.89522e-05	0.108037	0.121867	0.157844	0.0339922	0.0552943	0.0659315	0.052962	0.0681729	0.0572542	0.0548276	0.0206351	0.047293	0.0142478	0.00335184	0.0315616	0.0161215	0.0195123	0.0241964	0.0336092	0.0219533	0.0226738	0.00939845	0.0179789	4.25931e-05	0.0174313	0.0166651	0.00503728	0.0123671	0.0123455	0.0333447	2.41159e-06	0.0115641	2.41159e-06	2.41159e-06	0.0102455	0.00261012	0.0102062	0.00817896
F22W0	0.844544	0.263175	0.381656	0.313404	0.219494	0.200022	0.104667	0.0908337	0.109428	0.0500121	3.05058e-05	0.0941518	0.0835169	0.0497683	0.0510296	0.0479781	0.0375707	0.0942838	0.0577765	0.0582841	0.05891	0.0636959	0.0429851	0.0198842	0.0034351	0.0315841	0.0519115	0.0297998	0.0267967	0.0104766	0.0234706	0.0213712	0.0167112	0.0218937	4.57356e-05	0.0128895	0.0167483	0.0136983	0.0121186	0.0136418	0.00198557	2.64716e-06	0.0140328	2.64716e-06	1.19563e-05	0.00573896	0.0135875	0.0107437	0.00730487
F22W1	1.26987	0.317016	0.561375	0.459325	0.146192	0.249208	0.147733	0.121969	0.13713	0.0590355	6.73156e-05	0.105955	0.104184	0.0533064	0.0417662	0.0481818	0.0856267	0.0438119	0.0883829	0.0556475	0.0560575	0.0968249	0.0655485	0.0246735	0.0042371	0.0420564	0.0230006	0.0297303	0.0271952	0.0136585	0.0208991	0.0214944	0.0186193	0.0148683	7.04586e-05	0.016895	0.0236678	0.0280161	0.0181972	0.0198171	0.00118155	2.61849e-06	0.0155065	2.61849e-06	1.04061e-05	0.0140918	0.0148897	0.0110196	0.0101187
F22W4	1.21999	0.508937	0.547503	0.492121	0.161884	0.269548	0.138637	0.120553	0.1511	0.0944807	3.55174e-05	0.199814	0.0823007	0.0668408	0.109042	0.0753004	0.0702738	0.0596504	0.07225	0.0571019	0.0201516	0.106637	0.0636311	0.0370452	0.00308803	0.0469336	0.0352447	0.0268343	0.0246411	0.0161614	0.0214608	0.0328884	0.0475781	0.0171278	2.84174e-05	0.0207273	0.0226002	0.0177107	0.0176833	0.0211854	0.00414904	2.57782e-06	0.0209392	2.57782e-06	1.10353e-05	0.0114347	0.0171244	0.00910912	0.0101157
F12W0	0.980219	0.218344	0.43552	0.137756	0.21394	0.235336	0.12296	0.130678	0.125545	0.0408794	4.6163e-05	0.039605	0.0891464	0.0747905	0.11152	0.0781702	0.0962851	0.112491	0.0585994	0.0686699	0.0371189	0.0285058	0.0495434	0.01853	0.00361521	0.0397429	0.029013	0.0338309	0.029938	0.0165297	0.045745	0.0196875	0.0257851	0.0263965	6.26227e-05	0.0132483	0.0192763	0.00584571	0.0137612	0.012729	0.00145479	2.98993e-06	0.0170107	2.98993e-06	3.7696e-05	0.0158307	0.00458135	0.00719589	0.00863703
F12W1	1.04453	0.369531	0.414861	0.19868	0.286975	0.216898	0.120863	0.0824522	0.110353	0.0675659	2.77495e-06	0.228991	0.102044	0.129609	0.124337	0.100522	0.0836287	0.0802968	0.071236	0.0768375	0.110083	0.0420094	0.0474747	0.0191526	0.00563403	0.0341117	0.0267626	0.0458087	0.0323658	0.0290153	0.0457419	0.0301044	0.0275762	0.0185683	2.77495e-06	0.0259696	0.0182035	0.00782609	0.0131126	0.0260164	0.00196529	2.77495e-06	0.0173875	2.77495e-06	2.77495e-06	0.0138002	0.0104517	0.012963	0.00807454
F12W12	2.04771	3.76952	0.908534	0.449578	0.110181	0.320156	0.24276	0.0921218	0.179189	0.770455	3.02932e-05	0.0977448	0.120322	0.123465	0.0597104	0.0733827	0.0907714	0.0364444	0.0954447	0.0436997	0.0349389	0.100357	0.106963	0.403553	0.00357266	0.0543934	0.039601	0.0242853	0.0213157	0.0241314	0.0178949	0.0329607	0.0647354	0.0108297	2.26942e-06	0.0246585	0.0360191	0.0660982	0.0288072	0.02967	0.00164014	2.26942e-06	0.0195594	2.26942e-06	2.26942e-06	0.0148684	0.0126038	0.015173	0.0176231
F13W0	0.696968	0.157136	0.294447	0.119549	0.255196	0.182979	0.0801683	0.119161	0.0983363	0.0289348	2.4314e-06	0.0622424	0.0662486	0.130645	0.0532217	0.0721357	0.0658306	0.0743833	0.0478312	0.0513638	0.0670036	0.0246772	0.0333043	0.0144214	0.00385828	0.0298138	0.016568	0.0260189	0.0271936	0.0345673	0.0224924	0.0180476	0.0120021	0.0231542	2.40794e-05	0.0130524	0.0127584	0.00476508	0.00989972	0.00931987	0.0297843	2.4314e-06	0.00788501	1.2911e-05	8.14504e-05	0.0101384	0.00522681	0.00684712	0.00523128
F13W1	0.846358	1.6236	0.365582	0.412774	0.102985	0.157782	0.103909	0.0920478	0.0849041	0.314584	8.14429e-05	0.068865	0.0606739	0.159447	0.0301246	0.125599	0.0863297	0.0489839	0.0403677	0.0442293	0.0534596	0.0852591	0.0419416	0.154195	0.00446046	0.0259842	0.01729	0.0181641	0.0205094	0.026972	0.0169174	0.025339	0.0220484	0.0103778	0.000135512	0.0139369	0.0151679	0.029348	0.010716	0.00826441	0.0470594	2.04435e-06	0.0100648	2.04435e-06	1.9172e-05	0.0138956	0.0185261	0.00610063	0.00718962
F13W12	1.02651	2.93017	0.457014	0.507166	0.166289	0.257578	0.122541	0.0978799	0.140421	0.552226	2.9727e-05	0.102845	0.0909806	0.0499311	0.0364799	0.0709945	0.0913816	0.0799033	0.0766284	0.0563478	0.0516402	0.106131	0.0518395	0.275172	0.00344335	0.0433999	0.0195524	0.0259764	0.0253808	0.0452751	0.0227118	0.025832	0.0135386	0.0167965	0.000147333	0.0265272	0.0196266	0.0417814	0.014283	0.0187264	0.000906198	2.5714e-06	0.0131737	2.5714e-06	1.12639e-05	0.0147641	0.0197089	0.00741759	0.00837657
F13W4	1.17625	0.311194	0.512965	0.33417	0.110579	0.192347	0.13964	0.0903717	0.107467	0.0610244	2.22494e-06	0.0904789	0.0738849	0.155425	0.0897096	0.0983268	0.0971243	0.0520968	0.044567	0.0455195	0.0314535	0.0734292	0.0603925	0.021144	0.00477596	0.0340013	0.0146432	0.0199052	0.0176492	0.0264524	0.0195741	0.0211353	0.0363325	0.0100924	2.22494e-06	0.0181382	0.0208252	0.0134665	0.0169455	0.0095132	0.0426791	2.22494e-06	0.00871546	2.22494e-06	2.22494e-06	0.0159369	0.0122775	0.00782824	0.0106994
F14W0	0.636645	2.06977	0.28632	0.359507	0.184468	0.102405	0.0796265	0.125095	0.0560183	0.396552	0.00024139	0.0974922	0.0946982	0.11635	0.0446244	0.0362493	0.103564	0.0513862	0.0542376	0.0598338	0.0511539	0.0735219	0.0326678	0.183983	0.00510238	0.0167701	0.0260907	0.0245335	0.0371231	0.0206703	0.0251365	0.0124266	0.0104009	0.0170547	0.000529735	0.0152408	0.0125122	0.0366523	0.00980086	0.0100107	0.0223269	2.52433e-06	0.0126182	2.52433e-06	2.52433e-06	0.0169591	0.0169108	0.00518701	0.00557744
F14W1	0.715159	0.163215	0.284722	0.169203	0.264933	0.131879	0.0832957	0.097215	0.0722264	0.0316922	2.48945e-06	0.0513582	0.0892821	0.166087	0.05071	0.0654176	0.0751423	0.0450224	0.0592526	0.0527586	0.0325882	0.0360236	0.0325169	0.0187364	0.00485162	0.022382	0.0271866	0.0228489	0.0202404	0.0178191	0.0288202	0.0223076	0.00920654	0.0215378	3.681e-05	0.0143254	0.0123886	0.00573694	0.00870788	0.00937658	0.0440593	2.48945e-06	0.0134589	2.48945e-06	4.83263e-05	0.0119728	0.00921932	0.00860194	0.00496526
F14W12	0.952378	0.300519	0.399581	0.104166	0.31278	0.184769	0.116881	0.109864	0.0973663	0.0571958	2.7739e-06	0.0621323	0.0944315	0.0221699	0.0683846	0.08758	0.0395423	0.0566338	0.0568204	0.0630364	0.0768601	0.0203268	0.0446002	0.0316763	0.00592521	0.0308959	0.0300527	0.0351027	0.0333986	0.0329599	0.0316282	0.0213797	0.0328454	0.0225252	8.01245e-05	0.0275957	0.0176589	0.00545188	0.012625	0.0169796	0.00200891	0.000168259	0.0103397	1.7333e-05	2.7739e-06	0.00621354	0.0049131	0.0126232	0.00721354
F15W0	0.921901	0.178678	0.383751	0.279313	0.319059	0.1289	0.110053	0.133511	0.0668694	0.0334862	4.83643e-05	0.0555885	0.0676807	0.0152305	0.149443	0.100555	0.0315345	0.0904683	0.0291803	0.0751877	0.10881	0.0570095	0.042777	0.0172317	0.00680454	0.0209174	0.0400554	0.0366487	0.0346	0.0346947	0.0371883	0.0292966	0.0774378	0.0287411	4.71801e-05	0.0143915	0.0169923	0.0104892	0.0118322	0.0116068	0.00148286	2.18028e-05	0.0094815	2.42013e-05	7.30217e-05	0.00518228	0.0141477	0.00924258	0.00726121
F15W1	0.979124	0.143964	0.394265	0.0933581	0.33391	0.13759	0.11436	0.136071	0.0771949	0.0267872	1.62172e-05	0.0666467	0.0683125	0.0181427	0.0648836	0.113327	0.0375111	0.109447	0.0604632	0.0726961	0.0917779	0.0191665	0.0452381	0.0169669	0.00561766	0.0241844	0.0403438	0.0318522	0.0342417	0.0310522	0.0288669	0.0301551	0.0419079	0.0267458	3.14039e-06	0.0190422	0.0175282	0.00480683	0.0128365	0.0126191	0.00240743	3.14039e-06	0.00977272	3.14039e-06	3.14039e-06	0.00601905	0.0048968	0.00899224	0.00719888
F15W12	0.945859	0.406074	0.39879	0.249923	0.261841	0.121529	0.108836	0.118651	0.0691772	0.0755398	5.49447e-05	0.0434069	0.0750465	0.0140193	0.0550723	0.0640488	0.0403682	0.0441813	0.065032	0.0609916	0.0766105	0.0531064	0.0452408	0.035181	0.00390156	0.0217223	0.0381066	0.0243512	0.0302998	0.0147599	0.0260241	0.0140649	0.0747671	0.0165471	0.000223743	0.016072	0.0177088	0.0191401	0.0124939	0.0136748	0.00610828	2.70381e-06	0.00774989	1.40653e-05	2.70381e-06	0.00663348	0.0133516	0.00794791	0.00796965
F15W4	1.05385	0.147938	0.452512	0.122529	0.284554	0.114059	0.12159	0.124699	0.0626751	0.026916	0.000315189	0.092651	0.0847959	0.0188706	0.0681608	0.0764557	0.0459742	0.0726661	0.0643969	0.0673242	0.0573036	0.0251144	0.0513841	0.0160298	0.00544244	0.0192712	0.0321193	0.0305087	0.0163247	0.0244066	0.0270605	0.0347863	0.0155339	0.0161588	0.000726284	0.0128267	0.0197143	0.00463659	0.0132222	0.00907873	0.00240745	3.18186e-05	0.00677589	0.000323018	1.95009e-05	0.0074591	0.00466354	0.00759019	0.00827477
F16W0	0.116208	0.249608	0.0499243	0.0737806	0.444627	0.00341871	0.0130712	0.188867	0.00198344	0.046831	4.95727e-05	0.0212196	0.00600948	0.00208349	0.0689805	0.0059347	0.0224833	0.144264	0.000563278	0.0827395	0.117813	0.0148144	0.00526408	0.0179531	0.00671031	9.5028e-05	0.0548738	0.0542758	0.0292763	0.00283725	0.0504951	0.0016853	0.00116641	0.0398424	4.63168e-06	0.00212149	0.00488065	0.00367751	0.00144601	0.0010927	4.63168e-06	0.000115996	0.000818592	4.63168e-06	4.63168e-06	0.00321554	0.00180027	0.00042605	8.16868e-05
F16W1	1.16308	0.365304	0.519671	0.175972	0.177243	0.191463	0.135064	0.101648	0.1045	0.0670535	6.48703e-05	0.127648	0.0951517	0.0486114	0.0794735	0.0715806	0.0359401	0.0543399	0.0692992	0.0683315	0.0332931	0.0360689	0.0601654	0.0254312	0.00384784	0.0327618	0.0239758	0.032292	0.0282124	0.0334084	0.0287893	0.0267827	0.0194874	0.0201728	0.000117364	0.0238106	0.0216518	0.0123466	0.0166491	0.0131328	0.0015683	3.06234e-06	0.0110015	3.06234e-06	3.06234e-06	0.00583752	0.00527381	0.0107154	0.00974411
F16W12	0.972783	0.196967	0.430952	0.233069	0.265516	0.216408	0.12136	0.111325	0.118136	0.0362342	2.71262e-05	0.0936747	0.0798958	0.0654306	0.0778415	0.0644335	0.0447199	0.0692466	0.0607912	0.0557807	0.0704249	0.0468138	0.0491738	0.0159548	0.00392551	0.035156	0.0380046	0.0324721	0.0287442	0.0482933	0.0215548	0.0207299	0.0344763	0.0262741	2.74218e-06	0.0258127	0.0192142	0.0132773	0.0133736	0.0215072	0.00197563	2.74218e-06	0.00929085	2.74218e-06	7.05701e-05	0.00705383	0.00876556	0.00679075	0.00839765
F16W4	0.959488	0.199735	0.409895	0.35423	0.28961	0.193978	0.116756	0.14271	0.105469	0.0368236	2.91782e-06	0.0873857	0.0983993	0.0618828	0.0893843	0.0736109	0.0565475	0.0947395	0.0727848	0.0641127	0.0790158	0.0744236	0.0464135	0.0201282	0.00382844	0.0314962	0.0234147	0.0347115	0.0321449	0.0309528	0.0233	0.0273613	0.0264642	0.0247785	0.000231386	0.0314691	0.0182528	0.0126262	0.0140801	0.0171232	0.00179108	2.91782e-06	0.0129207	2.91782e-06	2.91782e-06	0.00884863	0.0161629	0.00888098	0.00812765
F17W0	0.952542	0.255003	0.417544	0.390469	0.234439	0.22289	0.119027	0.115976	0.120905	0.0493906	2.92416e-06	0.105294	0.0826075	0.0188318	0.0621155	0.0354784	0.0447867	0.0987533	0.0572316	0.0678199	0.0709768	0.0809115	0.0472079	0.0192044	0.00394265	0.0379693	0.0308563	0.0332691	0.0295716	0.0238929	0.0251691	0.0212624	0.015269	0.0207621	6.65375e-05	0.0165117	0.0172294	0.0169097	0.0133297	0.0149322	0.00171718	2.92416e-06	0.0134601	2.92416e-06	2.92416e-06	0.00718501	0.0168654	0.0102607	0.00756848
F17W1	1.23747	0.304289	0.545315	0.412373	0.17339	0.213799	0.143114	0.102274	0.118361	0.0559323	2.8528e-06	0.113059	0.107016	0.0155594	0.0649654	0.0697127	0.0736407	0.0526852	0.0912457	0.0664141	0.0438133	0.0873742	0.0620789	0.0253028	0.00462808	0.0368716	0.0221774	0.0280382	0.0269423	0.0266103	0.0237652	0.0236553	0.0164256	0.017898	2.8528e-06	0.0242648	0.0225581	0.0140524	0.0177582	0.0203927	0.00167206	2.8528e-06	0.0145184	2.8528e-06	0.000111572	0.0123335	0.014478	0.0128251	0.010131
F17W12	1.396	2.51149	0.602446	0.466194	0.144308	0.201387	0.168234	0.121485	0.112523	0.508395	2.88949e-06	0.112309	0.124061	0.0247153	0.086104	0.0773439	0.0744624	0.0279622	0.082905	0.0307624	0.0466864	0.102608	0.0717427	0.23028	0.0054003	0.0352141	0.0290172	0.0268438	0.0253713	0.0299824	0.0456267	0.0198783	0.0364765	0.0168128	2.88949e-06	0.0205165	0.0249876	0.0461001	0.0192104	0.014433	0.00164712	2.88949e-06	0.0109386	2.88949e-06	0.000811327	0.0118487	0.0208597	0.0106543	0.0123765
F17W4	1.08491	0.30003	0.436304	0.454956	0.118449	0.219335	0.132145	0.109063	0.119435	0.0572867	2.68126e-06	0.0833675	0.114789	0.0172911	0.119018	0.0739489	0.0932475	0.0744277	0.0765619	0.060485	0.0674912	0.0968279	0.0510203	0.0355444	0.00377807	0.0344315	0.067622	0.0273053	0.0299163	0.0243863	0.0257412	0.0252872	0.0377267	0.0240208	5.44404e-05	0.0166695	0.019275	0.0158047	0.0135051	0.0136082	0.00144719	2.68126e-06	0.0133039	1.46161e-05	5.79061e-05	0.0154622	0.0233343	0.013575	0.00901083
F18W0	1.21355	0.155802	0.510346	0.208827	0.292567	0.159227	0.139645	0.133409	0.0892415	0.0289072	0.000311233	0.0472855	0.102186	0.0611076	0.19183	0.0685432	0.185704	0.0792574	0.0821561	0.0668047	0.0869555	0.043131	0.0600133	0.0167865	0.00537875	0.0264841	0.0391309	0.0325023	0.0522158	0.0392696	0.0278191	0.0416176	0.00886794	0.0244287	0.000648006	0.0256178	0.0222011	0.00589989	0.0170712	0.0133347	0.00295434	3.06067e-06	0.0113217	3.06067e-06	2.37553e-05	0.0303011	0.00824008	0.00533836	0.00997252
F18W1	1.67879	0.381421	0.737681	0.542539	0.152814	0.321887	0.195175	0.0980698	0.178667	0.0739506	2.56998e-06	0.109088	0.120629	0.0938271	0.042031	0.0455907	0.0620042	0.0856681	0.098275	0.0510751	0.0289725	0.118339	0.0871487	0.0296224	0.00308926	0.0552915	0.0305073	0.0262951	0.0107253	0.0652377	0.0222697	0.0622616	0.0195298	0.0190409	1.39318e-05	0.0299238	0.0294528	0.0435212	0.0234485	0.0114936	0.00229465	2.56998e-06	0.0141878	1.3075e-05	3.69763e-05	0.00970441	0.0240159	0.0112365	0.0145862
F18W4	1.47964	0.313747	0.65197	0.509954	0.180554	0.245813	0.174647	0.125756	0.137974	0.0600459	0.000183823	0.127687	0.119219	0.0680095	0.0498752	0.0434337	0.0787198	0.0404129	0.10677	0.0592483	0.0589662	0.112216	0.076832	0.0221495	0.00826127	0.042222	0.0335006	0.0282356	0.0277424	0.0590071	0.0255079	0.0563063	0.00960905	0.0207628	2.99733e-06	0.0228685	0.0263229	0.0229623	0.021055	0.00781828	0.00198708	2.99733e-06	0.0131011	1.27101e-05	1.97718e-05	0.0131278	0.0181307	0.00865513	0.0124237
F19W0	1.25809	0.179492	0.532427	0.149833	0.322766	0.145672	0.157034	0.186434	0.0763837	0.0339776	1.77954e-05	0.0916062	0.102767	0.0569558	0.0936324	0.0934967	0.0341925	0.0789878	0.0680835	0.0730742	0.101429	0.0294588	0.0604297	0.0196322	0.0063323	0.023348	0.0424954	0.0374477	0.01445	0.0450614	0.0319253	0.0315756	0.0175924	0.0263106	5.13604e-05	0.0118816	0.0242246	0.00786643	0.0167056	0.00890929	0.00124386	1.7687e-05	0.0125932	2.32e-05	7.51708e-05	0.00554378	0.00796993	0.0109363	0.0100636
F19W1	1.06222	0.418989	0.453536	0.17612	0.265204	0.212057	0.12397	0.129411	0.114521	0.0804799	4.33483e-05	0.066499	0.0735318	0.0328613	0.0548011	0.0694491	0.190139	0.0576204	0.0638265	0.0559988	0.0711607	0.0365634	0.0527473	0.0469347	0.00503987	0.034364	0.0219079	0.0310616	0.0282589	0.0439397	0.0252544	0.0369037	0.0110574	0.0252274	0.000124187	0.0214936	0.0190941	0.00920797	0.0156414	0.0123315	0.00153117	2.64947e-06	0.0129405	2.64947e-06	0.00013642	0.0310785	0.00895955	0.0106591	0.00788176
F19W12	1.14118	0.204142	0.502246	0.118704	0.236236	0.178511	0.141008	0.0957073	0.0962962	0.0386719	4.3166e-05	0.0820003	0.0770546	0.0252967	0.0668138	0.0481373	0.111783	0.076876	0.0632735	0.055574	0.0611424	0.0235132	0.0574595	0.0176448	0.00581884	0.0290686	0.023492	0.0319125	0.0267522	0.0300997	0.0207355	0.0399333	0.00945457	0.0234285	0.000120094	0.023917	0.0217692	0.00539165	0.0154396	0.0113122	0.00325942	2.57773e-06	0.00728771	3.90157e-05	1.0997e-05	0.0184433	0.00348374	0.00959475	0.00944941
F19W4	1.13826	0.21674	0.490505	0.287741	0.270489	0.220964	0.0638428	0.0994252	0.121588	0.0399432	1.92086e-05	0.0721637	0.0768199	0.0440587	0.0813038	0.0741136	0.0587857	0.0404344	0.0630427	0.0589097	0.0512957	0.0591439	0.0566246	0.0217389	0.00492003	0.0375504	0.0238319	0.0326672	0.0302117	0.0731968	0.0263168	0.0342077	0.00564429	0.0283876	5.41542e-05	0.034058	0.021404	0.00924193	0.0157216	0.0129964	0.00122923	2.44311e-05	0.0130423	2.77314e-06	2.77314e-06	0.00928588	0.0113749	0.00981443	0.00888625
F20W0	0.608178	0.0840304	0.270626	0.0755591	0.151784	0.111146	0.073863	0.0544905	0.0604449	0.0154431	1.55914	0.0581441	0.0380696	0.00828261	0.0439331	0.0314215	0.0541844	0.0427378	0.0289669	0.0334276	0.0418582	0.0153323	0.0301897	0.00765892	0.546634	0.0182238	0.0192235	0.015753	0.026114	0.0057004	0.0126628	0.00950976	0.0070481	0.0171824	0.430378	0.00598829	0.0113862	0.00291887	0.0080709	0.00742165	0.00349637	0.224818	0.00573504	0.202979	0.208298	0.0084488	0.00306275	0.0038656	0.00506028
F20W1	0.854861	0.395428	0.369026	0.209275	0.255634	0.173214	0.104135	0.0987277	0.0927905	0.0746368	7.68376e-05	0.087387	0.0631442	0.01643	0.0796073	0.0828683	0.0574394	0.0759377	0.0485433	0.0557105	0.0686458	0.0421541	0.0409621	0.0386059	0.00441773	0.0293427	0.0243306	0.0313355	0.0281377	0.0118106	0.0214759	0.0248062	0.0148069	0.0238359	0.000139585	0.0104879	0.0160919	0.0130568	0.0113877	0.0129045	0.00189176	2.69924e-06	0.0101248	2.69924e-06	2.69924e-06	0.00941078	0.0111404	0.00730945	0.00670092
F20W12	1.03983	0.191373	0.45334	0.824091	0.211513	0.222807	0.127478	0.1057	0.119177	0.0364175	2.66466e-06	0.174319	0.0822152	0.0203385	0.0521442	0.0984353	0.0474641	0.0517048	0.0470526	0.0573344	0.0619235	0.173027	0.0517442	0.0168769	0.00305055	0.0358018	0.0321901	0.0296543	0.0279574	0.0202879	0.0212065	0.0237299	0.0145186	0.0190474	2.66466e-06	0.0134534	0.019248	0.030512	0.0141886	0.0218523	0.00180249	2.66466e-06	0.0165576	2.66466e-06	8.7765e-05	0.0073733	0.0333982	0.00899601	0.00906663
F20W4	1.07558	0.283036	0.491922	0.137912	0.218328	0.253276	0.134705	0.119994	0.135232	0.0538766	2.45818e-05	0.107329	0.0823298	0.0210775	0.0485338	0.0668669	0.0433041	0.104987	0.0563649	0.0687237	0.0391044	0.0277541	0.0550959	0.0366476	0.00462744	0.0415846	0.0120076	0.0348616	0.0291836	0.0218928	0.0268496	0.0231016	0.0305647	0.0202352	7.39484e-05	0.0182013	0.0212427	0.00628186	0.0148308	0.0169169	0.0024592	3.05107e-06	0.0108668	3.05107e-06	1.5362e-05	0.00647449	0.00451825	0.00930362	0.00903052
F21W0	0.785037	0.474396	0.313315	0.201238	0.282406	0.171021	0.0962432	0.109776	0.094858	0.0908912	3.89032e-05	0.0491722	0.0734491	0.0274014	0.0391868	0.0896534	0.0253002	0.0500484	0.0573241	0.0590916	0.0923806	0.0424572	0.0360049	0.0491868	0.00599943	0.0294444	0.0344254	0.0289376	0.0285794	0.0282634	0.0262958	0.0215285	0.0267159	0.0242506	7.59414e-05	0.0252058	0.0152111	0.0121059	0.00983829	0.012756	0.00140591	2.6042e-06	0.00879967	1.759e-05	2.26879e-05	0.00416468	0.0101343	0.0072707	0.00624434
F21W1	0.984107	0.349902	0.414768	0.212047	0.293521	0.13103	0.113093	0.130541	0.072394	0.0653949	2.03416e-05	0.0667751	0.0805794	0.0317119	0.0634717	0.109334	0.0306466	0.0715954	0.0677624	0.0572766	0.078517	0.0445529	0.0475822	0.0355907	0.00488908	0.0212703	0.0268306	0.0284838	0.0305174	0.0206133	0.0250224	0.0328812	0.0348515	0.0250102	2.78496e-06	0.0177896	0.0183573	0.0116053	0.0133708	0.0110233	0.00171032	2.93875e-05	0.00763113	2.78496e-06	2.78496e-06	0.00483422	0.0113951	0.00718315	0.0073874
F21W12	0.953274	0.501807	0.422553	0.159509	0.24984	0.140715	0.116541	0.0964273	0.0758588	0.0961104	6.13466e-05	0.0888086	0.0886304	0.0618821	0.0595931	0.0872253	0.0378695	0.0967225	0.0660562	0.0607441	0.0675764	0.031723	0.048474	0.0443372	0.00382668	0.0227097	0.0210163	0.0343796	0.0279315	0.026888	0.0218788	0.0201212	0.0180545	0.00909832	8.62091e-05	0.0197491	0.01797	0.0125108	0.0129759	0.0106838	0.00131911	2.72912e-06	0.00769888	1.04422e-05	2.72912e-06	0.00582384	0.00896202	0.00620049	0.00841853
F21W4	0.862676	0.283352	0.370825	0.158881	0.0110903	0.144461	0.101128	0.131968	0.0791025	0.0530745	1.78689e-05	0.111083	0.088321	0.0429919	0.0959187	0.102756	0.0891384	0.0680381	0.0608175	0.0652179	0.0750116	0.0320573	0.0426742	0.0300202	0.00456217	0.0228274	0.0368008	0.0327722	0.0331594	0.0290809	0.0280539	0.0162496	0.0196639	0.0161824	0.000278115	0.0224525	0.0164582	0.0108313	0.0117265	0.0152122	0.00159278	2.90186e-06	0.00755981	2.90186e-06	2.90186e-06	0.0142186	0.00912324	0.00706401	0.0066729
[truncated: 147 more columns]

## Sheet: Table S6B
Table S6 Relative abundances of metabolites in positive ion model (A) and negative ion module (B) that were significantly different between baseline and sample after FMT.
	NEG8769	NEG8711	NEG8055	NEG7603	NEG8308	NEG8216	NEG1350	NEG1806	NEG3951	NEG7554	NEG8717	NEG2390	NEG7587	NEG1815	NEG1807	NEG3356	NEG8777	NEG2551	NEG8613	NEG3575	NEG2467	NEG1764	NEG3524	NEG8712	NEG3676	NEG2332	NEG8768	NEG210	NEG8053	NEG3480	NEG186	NEG8228	NEG8073	NEG112	NEG8608	NEG513	NEG8409	NEG6343	NEG8267	NEG8046	NEG2445	NEG8521	NEG7600	NEG8141	NEG2389	NEG1762	NEG8147	NEG3608	NEG52
F1W0	1.67958	0.0313117	0.221495	0.165934	0.0800865	0.0750132	0.0426189	0.043508	0.030426	0.0293415	0.00180626	0.0337582	0.0381088	0.0329053	0.0259566	0.0373505	0.0267369	0.021243	0.0305354	0.0306038	0.0214758	0.0307285	0.000129273	0.00209019	0.029443	0.0209771	0.0312163	0.024292	0.0197506	0.0142992	0.00820117	0.00605883	0.0139295	0.0167273	0.0182742	0.0143319	0.0118289	0.0176781	0.0116389	0.0240519	0.0133682	0.00582268	0.00974768	0.011717	0.00943247	0.0130411	0.00420376	0.0128568	0.00660538
F1W1	1.05913	0.224325	0.297941	0.226625	0.082618	0.0618022	0.0676876	0.0565774	0.0220144	0.0565333	0.0138492	0.0566768	0.00601943	0.0395305	0.0264904	0.0307435	0.0327352	0.0301468	0.0117223	0.0240613	0.0365522	0.0211578	0.000460117	0.0187131	0.0213837	0.0219339	0.0184857	0.00962443	0.0443193	0.0177749	0.0159518	0.0295906	0.0228437	0.0179166	0.00502197	0.0145378	0.0200902	0.0109107	0.0130393	0.00833882	0.0166297	0.0251306	0.0143194	0.00671177	0.0163976	0.00700555	0.0118264	0.014938	0.00912447
F1W12	0.715427	1.82897	0.188854	0.0692229	0.118881	0.0882454	0.0528538	0.0518987	0.0530025	0.046167	0.124594	0.0524291	0.00539052	0.0259246	0.0349322	0.0266622	0.0285403	0.0246141	0.000683408	0.0217267	0.00102213	0.0206457	2.22546e-06	0.0623728	0.0160625	0.0204364	0.0129385	0.000350819	0.0180767	0.0174237	0.00722595	0.0259234	0.00990721	0.0193928	2.22546e-06	0.0123145	0.0139377	0.0107875	0.011916	0.00357196	0.00982986	0.0178842	0.00422543	0.00933633	0.015841	0.00800873	0.0199611	0.013421	0.00940407
F1W4	0.569653	2.78856	0.137533	0.28206	0.0950655	0.0538908	0.0585106	0.0481417	0.0190975	0.0427577	0.178232	0.049208	0.0506513	0.0291369	0.0316436	0.0268477	0.012089	0.0281843	0.000511552	0.0220408	0.0280671	0.0242269	2.32712e-06	0.093638	0.0197733	0.0234392	0.0116529	0.000497824	0.0113599	0.0145557	0.011478	0.0321892	0.0142543	0.0169092	0.000326442	0.014048	0.0194585	0.011322	0.0094018	0.00155688	0.0114318	0.020657	0.0174977	0.00796783	0.0151585	0.00986433	0.0162092	0.014264	0.00982457
F2W0	0.887498	0.00596373	0.173563	0.0538585	0.0597281	0.0590006	0.0697096	0.0613461	0.0450096	0.0423292	4.76254e-05	0.0271541	0.0075464	0.0179103	0.0248711	0.0233422	0.0248341	0.0195686	0.0273048	0.0198744	0.0192195	0.0322521	1.96522e-06	0.00193968	0.0251821	0.0204167	0.0254497	0.0227284	0.0161818	0.0206972	0.00584616	0.0096278	0.0110807	0.0119017	0.0150979	0.0123291	0.00812761	0.00967523	0.00887937	0.0157824	0.00686769	0.0036882	0.0031563	0.00606451	0.00815075	0.0125642	0.00424736	0.0050609	0.00681636
F2W1	0.48456	1.78388	0.125108	0.488832	0.133144	0.0876939	0.0428901	0.0184833	0.0670338	0.0276939	0.126802	0.0428916	0.00527191	0.025168	0.0373449	0.0211531	0.010487	0.0239845	0.000791434	0.0173436	0.0124889	0.0191014	1.7697e-06	0.0587044	0.0388206	0.0240176	0.00649401	0.000715263	0.012716	0.0419541	0.0125414	0.03769	0.0149401	0.0174541	0.00033658	0.0129194	0.0167213	0.00979965	0.0101733	0.00143339	0.00827481	0.0204198	0.0309668	0.00645107	0.0131267	0.00690116	0.0103969	0.0102968	0.0136493
F2W12	1.81922	0.0472466	0.146427	0.175151	0.155256	0.0745379	0.0612514	0.0738224	0.0873766	0.0341944	0.00206163	0.0473043	0.0389379	0.0355216	0.035124	0.045303	0.0473537	0.0271156	0.0382957	0.0275007	0.0103502	0.0157139	3.17895e-06	0.00432052	0.0349279	0.0181397	0.0234625	0.0289988	0.0213049	0.015234	0.0257692	0.012761	0.0165936	0.0142529	0.0219406	0.0148118	0.0268074	0.0241263	0.0116603	0.0158418	0.0110505	0.0103594	0.0103582	0.0170094	0.0137802	0.00652733	0.00768239	0.0112209	0.0099982
F2W4	1.26753	1.16869	0.31363	0.136222	0.142724	0.060219	0.0583434	0.0689984	0.0570463	0.058986	0.0774238	0.0454876	0.0195984	0.0378222	0.0340198	0.021281	0.0463224	0.0334123	0.0104078	0.0302833	0.0359546	0.0155817	2.95953e-06	0.0433288	0.0170128	0.0229621	0.0314149	0.00875507	0.0349704	0.00981125	0.0221897	0.0338974	0.0199605	0.0178779	0.00491668	0.0156895	0.023593	0.0151156	0.0114918	0.00769792	0.0111771	0.0200501	0.00817233	0.0105033	0.013041	0.00721489	0.0137474	0.00884349	0.0111295
F3W0	1.52405	0.0172341	0.194068	0.00468805	0.0658044	0.121531	0.0869549	0.0517174	0.0474347	0.0682487	0.000755487	0.0209906	0.00245859	0.0383692	0.0246251	0.0292272	0.014851	0.0326365	0.0418629	0.0222421	0.0329018	0.0342814	0.000604237	0.00163934	0.0167175	0.0264967	0.0300353	0.0315595	0.0253077	0.0226673	0.00518375	0.00985864	0.0211066	0.0181135	0.025812	0.015507	0.00991727	0.00730824	0.015951	0.0234654	0.0140031	0.0122052	2.20546e-06	0.00294395	0.00613007	0.01462	0.00306222	0.00805646	0.00768492
F3W12	0.637699	3.01577	0.184744	0.00320558	0.128055	0.0799129	0.0746303	0.0771016	0.0358749	0.0345462	0.192803	0.0293219	0.00425092	0.0417204	0.0343971	0.0358372	0.0157479	0.0252497	0.000375077	0.0189382	0.0235201	0.0311666	0.000211607	0.10535	0.0240099	0.0204363	0.0108262	2.70993e-06	0.0171122	0.0208075	0.00823835	0.024855	0.0121108	0.0161159	2.70993e-06	0.0146269	0.016516	0.0155905	0.00988785	0.00244811	0.0157871	0.0238975	2.76064e-05	0.0154259	0.00876539	0.0132485	0.0327076	0.0152898	0.0075885
F3W4	0.569963	2.81518	0.128223	0.00563827	0.119925	0.0607213	0.0620714	0.0783829	0.097624	0.046851	0.178484	0.0352691	0.00403827	0.031671	0.0300138	0.0302931	0.0192439	0.0215675	2.60503e-06	0.0246943	0.0266186	0.0282464	2.60503e-06	0.0968839	0.0194969	0.0216082	0.0165027	2.60503e-06	0.0137175	0.0226151	0.00852243	0.0374503	0.0135977	0.0161941	2.60503e-06	0.0126081	0.0215433	0.0112941	0.0106061	0.00209711	0.0124275	0.0249852	7.99804e-05	0.0122646	0.0103213	0.0116332	0.0276691	0.0154064	0.0105203
F4W0	1.09883	0.995843	0.271789	0.00313058	0.143009	0.155562	0.0781876	0.0829604	0.0306403	0.0459636	0.0632113	0.0359974	0.00228715	0.0453802	0.0319269	0.0376794	0.0404994	0.028875	0.00816858	0.0315802	0.027604	0.0325922	2.9753e-06	0.0365359	0.0206064	0.0232498	0.0191137	0.00654184	0.0226136	0.00771345	0.00677606	0.0142382	0.0163787	0.0125491	0.00353284	0.0154056	0.0126647	0.0207671	0.0193529	0.00516991	0.0147017	0.021991	2.9753e-06	0.0172481	0.0105531	0.0134891	0.0213947	0.000298541	0.00614984
F4W1	1.12121	0.0123411	0.249085	0.983331	0.0962811	0.136265	0.0667776	0.0373767	0.0855314	0.0600389	0.000243001	0.0543588	0.360809	0.0431361	0.015393	0.0318065	0.0494687	0.0337395	0.0537016	0.0249461	0.0376632	0.0252151	2.83955e-06	0.0017989	0.0141029	0.0248452	0.0203981	0.0427387	0.0270609	0.00811799	0.0110142	0.0159698	0.0187905	0.0180417	0.030134	0.0150023	0.0156926	0.0141048	0.0260195	0.0190294	0.0148977	0.00848367	0.0631144	0.00613589	0.0157035	0.00873729	0.0073269	0.000297719	0.00716873
F4W12	1.33101	0.0182365	0.193601	0.000431379	0.0677499	0.0872558	0.0496132	0.0269591	0.011975	0.0345084	0.00053168	0.025119	0.000660066	0.0369018	0.00970475	0.0281776	0.0225295	0.0273032	0.0327797	0.0249232	0.0260672	0.0442241	0.000139575	0.00237158	0.0203174	0.025456	0.0138336	0.0270853	0.0189891	0.0111263	0.00447043	0.00806573	0.0166277	0.00887683	0.0197602	0.0153127	0.0131866	0.0111807	0.0152858	0.0135893	0.0114253	0.00892919	1.43656e-05	0.00869069	0.00652569	0.0175617	0.00916477	0.00593502	0.00510001
F4W4	1.93118	0.0131794	0.273108	0.518244	0.0977526	0.0872197	0.070591	0.0483685	0.0782568	0.0677028	0.000349887	0.0588583	0.223948	0.0381768	0.0268826	0.0550769	0.0304958	0.0352212	0.0461949	0.0287824	0.0366403	0.0191088	0.000380882	0.00169999	0.0161649	0.0224173	0.0269156	0.0385836	0.0303255	0.00845019	0.00814865	0.0148193	0.0182437	0.0134694	0.0246939	0.017933	0.0118239	0.0137962	0.0201529	0.0184487	0.0114873	0.00645094	0.0319388	0.00856749	0.0182667	0.00740344	0.0066765	0.000119816	0.0078122
F5W0	1.77629	0.0183073	0.18739	0.0173144	0.0455494	0.0996231	0.134093	0.0362595	0.0453897	0.0576298	0.000526521	0.0174276	0.00912102	0.0391777	0.0237145	0.0260166	0.0341239	0.0277452	0.042002	0.0208026	0.0294429	0.0260632	0.400976	0.00238714	0.0141546	0.0241825	0.0243288	0.0317815	0.0221129	0.00868895	0.00655483	0.00654249	0.0214882	0.0144007	0.0246947	0.0133893	0.0124659	0.00488058	0.0159111	0.0152339	0.0161773	0.00736554	0.000571298	0.00329131	0.00530246	0.01055	0.00225746	0.00822937	0.00615771
F5W1	0.800695	0.0105954	0.183344	0.0143285	0.0599126	0.0699299	0.046325	0.103578	0.0799012	0.043271	0.000414079	0.0176356	0.0190932	0.0368062	0.038554	0.0383713	0.021664	0.024369	0.029446	0.055517	0.0240605	0.0328402	0.460406	0.00285402	0.0256246	0.0225088	0.0165215	0.0236903	0.0198198	0.01657	0.0563897	0.00644667	0.0132153	0.0157338	0.017038	0.0137405	0.0128194	0.0110853	0.0104102	0.0174922	0.00845115	0.0068956	0.000432037	0.011199	0.00530806	0.0143165	0.00365558	0.00334547	0.00570005
F7W0	1.68327	0.0158973	0.253717	0.12383	0.090771	0.100498	0.114692	0.0551269	0.0290245	0.0694725	0.000508121	0.0388977	0.0447383	0.0347143	0.0219943	0.0345934	0.0483036	0.0327302	0.0405017	0.0295856	0.0310262	0.0306129	0.000315969	0.00296443	0.0201733	0.0216515	0.0352177	0.0317255	0.0248827	0.00900605	0.00513538	0.00961958	0.0182043	0.0123241	0.0235271	0.0152362	0.0120218	0.0135323	0.0125386	0.0209387	0.0143271	0.0053632	0.00764401	0.0103322	0.0112742	0.0121395	0.00520578	0.00856231	0.00868575
F7W1	1.04937	2.34099	0.218672	0.368775	0.103898	0.0748367	0.0746575	0.0923684	0.0203582	0.0638999	0.151303	0.0355999	0.00697909	0.0410666	0.0356866	0.029827	0.0208466	0.0261459	2.44436e-06	0.0235797	0.0325035	0.0185114	2.44436e-06	0.0767714	0.0192708	0.0229899	0.0211757	2.44436e-06	0.0180088	0.0210085	0.0119809	0.0240949	0.0164131	0.0147212	2.44436e-06	0.0150018	0.0201565	0.0104897	0.0136741	0.00405303	0.0159896	0.0207769	0.023342	0.0105195	0.0104629	0.00771215	0.0239368	0.010757	0.0122252
F7W12	1.16324	0.0385577	0.172156	0.39995	0.111463	0.0759774	0.0685308	0.0792361	0.126743	0.0418179	0.00175691	0.0620385	0.18944	0.0354615	0.0517677	0.0417072	0.0284424	0.0176449	0.0361897	0.033009	0.0234388	0.01954	2.86342e-06	0.0038173	0.0271875	0.0175792	0.0192543	0.0287599	0.0202467	0.0218373	0.0077409	0.00815636	0.014811	0.0168239	0.021264	0.0127509	0.0162636	0.0244916	0.0116794	0.013286	0.0119311	0.00740472	0.0251337	0.0157826	0.0181919	0.00817835	0.00420535	0.0112381	0.0179059
F7W4	0.869128	2.68149	0.0840235	0.010211	0.102816	0.097679	0.0612718	0.229534	0.123465	0.0524864	0.17209	0.0382307	0.0329559	0.0341193	0.102403	0.0373296	0.0124406	0.0244823	2.83815e-06	0.0303794	0.0271658	0.0264386	2.83815e-06	0.0913935	0.0272127	0.020269	0.0182568	2.83815e-06	0.00886928	0.0167127	0.0073785	0.0161754	0.0102389	0.00977686	2.83815e-06	0.0133602	0.0179445	0.0176152	0.0124099	0.00173368	0.0126712	0.0323368	0.000260543	0.0161085	0.0118325	0.0116245	0.0132126	0.00839724	0.00994454
F8W0	1.35003	0.0125474	0.181168	0.00458853	0.0477204	0.0611416	0.0868371	0.0543398	0.0308953	0.033187	0.000528582	0.0241254	0.00925099	0.0234741	0.0244926	0.0241066	0.0238163	0.0310939	0.0243733	0.0206536	0.0202662	0.04245	0.172196	0.00200388	0.0281746	0.027782	0.0124438	0.0207815	0.0159446	0.0259343	0.0052233	0.0105127	0.0132541	0.0139671	0.0144897	0.0135428	0.0083494	0.00614037	0.00760493	0.0152277	0.00766511	0.00469936	2.38748e-05	0.0070754	0.00703719	0.0172559	0.00532732	0.00958612	0.00464701
F8W1	0.427773	2.82933	0.0942743	0.0179705	0.0924089	0.0929088	0.0862413	0.0853847	0.0329101	0.037778	0.185079	0.0359887	0.00451297	0.0240253	0.0370654	0.0300782	0.0297674	0.0288932	2.38078e-06	0.0256605	0.0234949	0.0372003	0.000120142	0.0963857	0.0259707	0.0243447	0.0130113	2.38078e-06	0.011957	0.0208933	0.015138	0.0225004	0.0105354	0.017366	2.38078e-06	0.0148294	0.0122377	0.0127713	0.00792232	0.00185056	0.0101019	0.0189334	0.00171057	0.0144709	0.0102744	0.0159419	0.0196735	0.00973083	0.00698978
F8W12	0.778025	0.0557364	0.168521	8.08132e-05	0.0916626	0.060253	0.0735195	0.0707662	0.0330581	0.0493512	0.00345708	0.0288797	0.00155226	0.0350527	0.0315509	0.0340836	0.0339519	0.022452	0.026935	0.02831	0.00680634	0.0448877	0.00017886	0.00374204	0.0306295	0.0279019	0.0157633	0.0214996	0.0175148	0.0260062	0.00730548	0.0164064	0.0137997	0.0402386	0.0179721	0.0151463	0.00671013	0.0150009	0.00856764	0.0128641	0.0101882	0.00939942	2.69843e-05	0.0120779	0.00855607	0.0187808	0.0071386	0.00899427	0.00527966
F8W4	0.384556	2.70933	0.192042	0.0830615	0.103611	0.0476312	0.0375371	0.1022	0.054953	0.0482027	0.178064	0.0686448	0.0625266	0.0263368	0.0540376	0.0237751	0.0132176	0.0281139	0.000528687	0.0185793	0.0278248	0.0261127	1.79793e-06	0.0833973	0.0164013	0.0258343	0.00616279	1.79793e-06	0.0101975	0.0222832	0.0154452	0.0203421	0.015749	0.0231507	1.79793e-06	0.012679	0.0154266	0.00921897	0.00925777	0.00403041	0.00924854	0.0198618	0.00542852	0.00686615	0.0196236	0.00922691	0.0200573	0.0126585	0.0135519
F9W0	0.88397	0.01063	0.149543	0.0500651	0.0793522	0.0948166	0.0640045	0.0287672	0.0202499	0.0649464	0.000331039	0.0252451	0.00552568	0.0368524	0.0140384	0.0228161	0.0291853	0.0344731	0.0421432	0.0191255	0.0323185	0.0301822	2.73136e-06	0.00190185	0.0165348	0.0270385	0.0184918	0.0332396	0.0230146	0.0117996	0.00635614	0.0135912	0.019535	0.0124625	0.0237958	0.015807	0.0118872	0.00916431	0.0168371	0.0133735	0.0134389	0.00729089	0.00274412	0.0072939	0.00789885	0.0124037	0.0067946	0.00474634	0.00660972
F9W1	0.757897	2.84382	0.141469	0.160211	0.177753	0.152047	0.0811271	0.0732425	0.120567	0.0433675	0.188208	0.0611773	0.0113107	0.0382302	0.0363979	0.0513509	0.0203514	0.0314698	0.0110935	0.0417867	0.0294031	0.0155524	3.56987e-06	0.0982612	0.0274943	0.0190099	0.0113415	0.0094569	0.0124696	0.01293	0.0125578	0.0340838	0.0132466	0.0159121	0.00101724	0.0183519	0.02369	0.0286811	0.0213154	0.00260214	0.0172274	0.0341048	0.00992575	0.0274317	0.0177264	0.00600864	0.0506427	0.00501002	0.0139284
F9W12	1.59266	0.0318893	0.231673	1.95144	0.117276	0.0798372	0.0441459	0.0965987	0.0813303	0.0298731	0.00103196	0.0306805	0.141975	0.0311022	0.0404569	0.0403455	0.0228392	0.0270812	0.0282526	0.0528067	0.0238245	0.024002	2.87917e-06	0.00279433	0.0253404	0.0192405	0.0225265	0.0222094	0.0145158	0.0195255	0.01099	0.0135984	0.0151449	0.0192954	0.0156987	0.0126564	0.00746033	0.0212458	0.0114529	0.0205571	0.0114432	0.0157169	0.12334	0.0140687	0.00911237	0.00968256	0.0136472	0.0137931	0.00949021
F9W4	0.61888	2.07393	0.103338	0.0265606	0.185676	0.0505658	0.0804295	0.0791375	0.0610953	0.0553852	0.132391	0.0414291	0.00948337	0.0469617	0.0346662	0.0470285	0.0136743	0.0300363	3.5374e-06	0.0397647	0.0301681	0.0259383	3.5374e-06	0.0692555	0.0285113	0.0221444	0.0200937	3.5374e-06	0.0109384	0.0156686	0.0164652	0.0308555	0.0128339	0.0374884	3.5374e-06	0.0172217	0.0177182	0.0233457	0.0141916	0.00177613	0.0172391	0.0381692	0.000724564	0.0197957	0.0127447	0.0114222	0.0243952	0.0141653	0.0116072
F10W0	0.888554	1.49745	0.313969	0.0834985	0.110673	0.122835	0.118898	0.0593207	0.0815036	0.0332202	0.103326	0.0259139	0.0112928	0.0351641	0.0341711	0.0244456	0.0342352	0.0266063	0.0135391	0.0203435	0.028555	0.0177309	1.98871e-06	0.0501377	0.0182013	0.0213953	0.0179223	0.00541652	0.0277783	0.0222393	0.0129573	0.0229716	0.01469	0.0189563	0.00117588	0.013381	0.0172786	0.0106779	0.0134259	0.0046544	0.010072	0.0155632	0.00337744	0.00524172	0.00825433	0.00613272	0.00846214	0.0103479	0.00872849
F10W1	1.64144	0.00900989	0.227373	0.0768607	0.0730513	0.0964815	0.0555759	0.0697103	0.0545925	0.046396	0.000256043	0.020936	0.0156769	0.0285125	0.0336058	0.0256716	0.0241311	0.0252094	0.034567	0.0213036	0.0285353	0.0197914	0.000120149	0.0015631	0.0231476	0.022968	0.0199034	0.0260501	0.0233096	0.033584	0.011191	0.0135716	0.0149875	0.0160275	0.0194548	0.0125863	0.0110619	0.00874757	0.0126141	0.0179431	0.0112466	0.00748149	0.00435944	0.00472013	0.00569981	0.00819246	0.00418545	0.0093176	0.00611517
F10W4	0.930091	2.97844	0.200817	0.00468513	0.161663	0.135194	0.0930661	0.092884	0.0336326	0.035249	0.199595	0.0490919	0.00759235	0.0434947	0.0436532	0.037464	0.0210179	0.0265009	0.00338159	0.0306907	0.0295506	0.0223939	0.000144833	0.103921	0.0197967	0.0180449	0.0208566	0.00295029	0.0172593	0.00702742	0.00651765	0.0306416	0.0113758	0.0157389	0.000583604	0.0134856	0.0151432	0.0183691	0.0149406	0.00353628	0.0142956	0.0234549	3.03536e-06	0.0188976	0.0147411	0.0091358	0.0260354	0.010378	0.0069135
F22W0	1.19606	0.04226	0.141763	0.0149003	0.113755	0.0762526	0.0767747	0.0504023	0.038098	0.0553353	0.00240704	0.0248253	0.0142786	0.0364095	0.0191753	0.0283681	0.0236844	0.0277725	0.0327884	0.0248141	0.0247417	0.0370193	2.44878e-06	0.00283121	0.0215316	0.0233585	0.0239628	0.027129	0.0173302	0.0129639	0.00560301	0.0102009	0.014733	0.0159252	0.0201089	0.0134645	0.0108796	0.0103678	0.0142424	0.00798006	0.0127854	0.00554317	0.000778544	0.00931857	0.00742821	0.0151526	0.00462064	0.00997021	0.00718403
F22W1	0.90252	0.0375785	0.111247	0.127891	0.107163	0.0727413	0.0619955	0.0790964	0.0476037	0.0479035	0.00177418	0.0325225	0.0625121	0.0301305	0.0324752	0.0310802	0.0375796	0.0258603	0.0327062	0.0264615	0.0208302	0.028031	2.39349e-06	0.00208432	0.0290757	0.0182027	0.0216275	0.025869	0.016679	0.0223816	0.0102321	0.0161655	0.0145622	0.0379183	0.0192141	0.0128117	0.00969569	0.011826	0.0134124	0.0122143	0.00897497	0.00518319	0.00793466	0.0123438	0.00944738	0.0117583	0.0105036	0.0123349	0.0124159
F22W4	1.54481	0.0786038	0.138419	0.0796633	0.110859	0.0673055	0.0625149	0.0772838	0.120192	0.0378757	0.00461104	0.0399068	0.0318017	0.0264918	0.0319496	0.0323156	0.0234074	0.0343129	0.0293691	0.0268251	0.0218075	0.0262224	2.43226e-06	0.00497916	0.0302532	0.0178094	0.0205286	0.0218924	0.0173834	0.0203716	0.0114675	0.0163932	0.0135717	0.0165473	0.0172117	0.0136339	0.00752123	0.0136511	0.0106733	0.0130053	0.0104942	0.00936549	0.00436526	0.0132384	0.0128462	0.0119198	0.00628105	0.0138973	0.00933748
F12W0	1.06207	0.0252936	0.218343	0.209552	0.0842509	0.0864581	0.0537812	0.0445485	0.0576131	0.0365264	0.000359049	0.0293957	0.0100712	0.0388517	0.0254545	0.0164718	0.0286366	0.0309215	0.0363507	0.0192041	0.0282944	0.0286325	0.000140789	0.0031701	0.0245744	0.0223891	0.0269994	0.0302368	0.0204337	0.0153104	0.00816006	0.0117849	0.0183259	0.0147272	0.0217959	0.016078	0.0101008	0.013032	0.0128783	0.0162432	0.0120388	0.00654944	0.0134839	0.0102227	0.00890288	0.0119536	0.0072989	0.00930886	0.00875479
F12W1	0.981818	0.0106183	0.221998	0.126807	0.085167	0.146309	0.0580093	0.0226401	0.0624266	0.0629084	0.000246295	0.0398735	0.0182359	0.0352547	0.0367228	0.0298095	0.0243697	0.0310762	0.0459009	0.0226752	0.0338165	0.0141035	0.000789064	0.00206544	0.0171798	0.0204181	0.0314455	0.0345178	0.02606	0.0149698	0.015351	0.0191239	0.0205185	0.018167	0.0264627	0.015089	0.0130735	0.0104995	0.0119087	0.0195107	0.0119242	0.0062612	0.00799176	0.00363433	0.0115157	0.00260068	0.00682344	0.0124604	0.0146649
F12W12	1.03095	0.0877835	0.193549	0.536021	0.134858	0.0750705	0.0718678	0.101755	0.208432	0.0345776	0.00397206	0.0398953	0.106939	0.0258693	0.0438145	0.0431874	0.0275758	0.0210953	0.0344358	0.0346406	0.0230956	0.0154733	2.89558e-06	0.00545197	0.0272445	0.0166745	0.0219091	0.0268148	0.0189822	0.0117404	0.0267389	0.0160256	0.0150588	0.0141915	0.0195925	0.0125982	0.0107711	0.0221335	0.0125967	0.0139079	0.00911797	0.00933851	0.0335674	0.0187902	0.0114767	0.00650638	0.015593	0.0119216	0.0121992
F13W0	1.0805	1.46662	0.311584	0.00482726	0.146619	0.136339	0.124319	0.0725232	0.0363001	0.0543127	0.0968124	0.0363555	0.00629204	0.0334324	0.038993	0.0318409	0.0418846	0.0136308	0.00265126	0.0296812	0.0322172	0.0208113	2.84844e-06	0.0508086	0.0172057	0.0188254	0.0200513	0.0011563	0.0231119	0.0108013	0.00480768	0.030945	0.0153772	0.0110339	0.000954192	0.0144189	0.0140498	0.0136063	0.01552	0.00523055	0.0132657	0.0217891	2.95694e-05	0.0114604	0.0110753	0.00777821	0.0184227	0.00863716	0.00737273
F13W1	0.787948	2.1479	0.0781903	0.345401	0.134996	0.0866036	0.0857734	0.0708791	0.0659702	0.0262768	0.149462	0.0293673	0.0198886	0.0219057	0.0353401	0.0289926	0.0274539	0.00398395	2.36476e-06	0.0245938	0.0248362	0.02423	2.36476e-06	0.0744521	0.0231733	0.0206777	0.00993014	0.000329472	0.00789511	0.0323939	0.0172743	0.041215	0.0127993	0.0272477	2.36476e-06	0.0129079	0.0155048	0.0132426	0.0122488	0.0012147	0.00871995	0.0215151	0.0189403	0.0149019	0.00896191	0.00988731	0.0241193	0.0123913	0.00876646
F13W12	0.659864	0.0285545	0.144782	0.0237775	0.0963869	0.0657017	0.0783104	0.0903542	0.0360178	0.0319902	0.000659328	0.0270708	0.00454188	0.0216056	0.0450349	0.0314319	0.0372132	0.0263169	0.031214	0.026825	0.0222885	0.0230652	2.48662e-06	0.00287697	0.0239846	0.0203807	0.0162674	0.0265784	0.01703	0.0209614	0.012741	0.00982059	0.0150219	0.0135421	0.0184726	0.0127607	0.011021	0.0149898	0.00958305	0.0125346	0.00989151	0.00461061	0.000720719	0.0112474	0.00795033	0.00988221	0.00371692	0.00842513	0.00817425
F13W4	0.410353	2.44943	0.0719265	0.0310348	0.129624	0.0857322	0.0572241	0.0741043	0.105837	0.0259637	0.162664	0.0337435	0.00686325	0.0278421	0.0356765	0.0353402	0.0291806	0.00186573	2.46462e-06	0.0286102	0.0206334	0.0269874	2.46462e-06	0.0864564	0.03396	0.0192321	0.0153414	2.46462e-06	0.00858032	0.0386112	0.00904517	0.0300676	0.0101023	0.0130626	2.46462e-06	0.0127219	0.0141094	0.0172821	0.0138265	0.00164381	0.00991008	0.0243609	0.00148392	0.016454	0.00974562	0.0110639	0.023072	0.0141781	0.00731649
F14W0	2.22293	0.843383	0.351548	0.010946	0.117452	0.0600487	0.0682958	0.0667543	0.036294	0.0699127	0.0545543	0.0456819	0.00294754	0.0391586	0.0285054	0.0249903	0.0315209	0.0304222	0.00967601	0.00363331	0.0329182	0.0317733	3.31337e-06	0.0389298	0.0203822	0.0212317	0.0220146	0.00770842	0.0297913	0.00774995	0.0074167	0.014545	0.0208435	0.010501	0.00483156	0.0173344	0.0129688	0.0166681	0.0146823	0.00956268	0.015694	0.0243205	0.00029455	0.0151363	0.0138098	0.0129283	0.0160787	0.00341954	0.00864496
F14W1	1.07787	2.31128	0.162307	0.12617	0.110877	0.0618428	0.0637622	0.0786978	0.0278639	0.0596986	0.161608	0.0586841	0.0123287	0.0387267	0.0340008	0.0325596	0.011821	0.0313325	2.77558e-06	0.02513	0.0341729	0.0206639	0.000451218	0.0813644	0.0160497	0.0229222	0.022222	2.77558e-06	0.0151674	0.0152948	0.0110451	0.0308307	0.0197311	0.0164093	2.77558e-06	0.015174	0.0186342	0.0109676	0.017934	0.00224722	0.0168632	0.0290103	0.00735208	0.01277	0.0162058	0.00750427	0.016275	0.0111366	0.0124865
F14W12	0.929164	0.0144483	0.184014	0.101548	0.0612874	0.0829779	0.0795568	0.0658172	0.0686324	0.061791	0.00049317	0.0442435	0.00406827	0.0338524	0.0264614	0.0269281	0.0252496	0.0284286	0.0375282	0.0209743	0.0282607	0.0245676	0.000963206	0.00214107	0.0167433	0.024074	0.0184836	0.0315791	0.0203999	0.0216477	0.00887949	0.0121303	0.0183651	0.0106696	0.0219683	0.0141761	0.0128969	0.0081893	0.0124827	0.0140971	0.0118731	0.00746002	0.0063908	0.00327184	0.0134579	0.00947775	0.00310736	0.0115909	0.0123692
F15W0	1.32748	0.0253638	0.256195	0.477816	0.0844917	0.119526	0.131981	0.0566383	0.15043	0.0633173	0.00117026	0.0255262	0.0087771	0.0344894	0.0285728	0.0264562	0.0359846	0.0290875	0.0426777	0.020647	0.0304595	0.0193433	0.000470381	0.00301057	0.0200241	0.0282321	0.0265002	0.0339951	0.024854	0.0266034	0.00817565	0.00980804	0.0197509	0.0194408	0.0250461	0.0133636	0.0172841	0.0101364	0.0101552	0.0171344	0.0121254	0.00528284	0.0296441	0.00402417	0.00779292	0.00794909	0.00213398	0.00596008	0.0107546
F15W1	0.854962	0.0233703	0.201789	0.0882783	0.0880459	0.103097	0.062447	0.0548356	0.0899714	0.0670447	0.00101038	0.0206486	0.0185768	0.0372724	0.0283947	0.0313114	0.0202179	0.0239997	0.0430647	0.0244304	0.0315787	0.0222847	0.000290629	0.0020606	0.0169839	0.0237781	0.0212058	0.0331964	0.022459	0.0162397	0.00602162	0.0104614	0.0191597	0.0184208	0.0263457	0.0141868	0.0117146	0.00910189	0.0136758	0.0145196	0.0123018	0.00846795	0.00537034	0.00696997	0.00601023	0.00804731	0.002297	0.00651466	0.0111596
F15W12	1.3406	0.0301215	0.159026	0.0023652	0.0860231	0.086469	0.118971	0.0467327	0.140454	0.0604254	0.00191084	0.0141083	0.00341387	0.027081	0.0226594	0.0253838	0.0340688	0.0408306	0.0323832	0.0202172	0.0271356	0.0276376	2.17552e-06	0.00303871	0.017584	0.0250569	0.0133646	0.0253953	0.0181406	0.0149444	0.00368968	0.0108386	0.0156114	0.0159417	0.0193597	0.013344	0.00763623	0.00834511	0.0126688	0.0120295	0.00988521	0.0110498	2.17552e-06	0.00731696	0.00408467	0.0100355	0.00262996	0.00661164	0.0075948
F15W4	1.02365	0.0696776	0.198844	0.702919	0.107414	0.102765	0.0671844	0.0235049	0.0354201	0.0618874	0.00347649	0.0152596	0.107599	0.0403518	0.00997102	0.0330569	0.0259553	0.0324145	0.0418559	0.0337371	0.024155	0.0307541	0.000289626	0.00562092	0.0198314	0.0235917	0.0212961	0.0326473	0.0223876	0.0194745	0.0157464	0.0168247	0.0192402	0.0155456	0.0212863	0.0162936	0.0131312	0.0121257	0.0124579	0.017116	0.0142204	0.00836399	0.0444102	0.00665739	0.00466464	0.012395	0.00595596	0.0104805	0.00819669
F16W0	1.13722	0.0211104	0.22629	0.157966	0.0985154	0.101167	0.0435107	0.0763258	0.0339344	0.0653189	0.000822512	0.0426973	0.0492883	0.039608	0.0321813	0.0402331	0.0444194	0.0269908	0.0364402	0.0264635	0.0280102	0.0272986	2.7078e-06	0.0028665	0.0194894	0.0212207	0.0343947	0.0305823	0.0245458	0.00808696	0.00673598	0.00773608	0.0183397	0.0127998	0.0218498	0.013188	0.010074	0.0120481	0.014216	0.0190784	0.0111299	0.00371809	0.00968312	0.014543	0.0113247	0.0106995	0.0026329	0.00521643	0.00766559
F16W1	1.28702	0.0390148	0.202653	0.0975566	0.112638	0.0932053	0.0720015	0.048486	0.0553319	0.0637931	0.00192368	0.0340917	0.0414735	0.0398363	0.0214108	0.0430361	0.0277141	0.0294199	0.0393663	0.0530403	0.0282794	0.0253419	3.23123e-06	0.002261	0.0251311	0.0218074	0.0220758	0.0317017	0.0223919	0.00971413	0.00792433	0.0122502	0.0164739	0.0126185	0.0231464	0.0159877	0.0143873	0.0171633	0.01506	0.0179303	0.012524	0.00921702	0.00564324	0.0200317	0.010891	0.0105679	0.00345236	0.00614951	0.00658802
F16W12	1.54898	0.0182524	0.1271	0.262402	0.105112	0.0758479	0.0562785	0.0890431	0.0737572	0.0557868	0.000836197	0.0307753	0.104457	0.0269097	0.036964	0.0282626	0.0254156	0.0258238	0.0316554	0.023823	0.00110447	0.0301691	2.36009e-06	0.00213187	0.0214328	0.0198886	0.0277717	0.0259936	0.0180184	0.0159327	0.00740512	0.0161618	0.0161274	0.0138611	0.0205291	0.0124429	0.0106967	0.0114484	0.0131269	0.0121931	0.00972651	0.00669607	0.0165898	0.012941	0.00892739	0.012303	0.00542478	0.00927661	0.00659569
F16W4	1.42376	0.0294282	0.205617	0.169084	0.111469	0.101172	0.0453165	0.088642	0.0567347	0.0386819	0.00144246	0.0383836	0.0608513	0.0314918	0.0354733	0.0296113	0.0360224	0.026315	0.0381671	0.0240867	0.0261198	0.0251883	2.54741e-06	0.00323893	0.0203692	0.0197038	0.0183458	0.0314937	0.0229771	0.01493	0.0052892	0.00913257	0.0167094	0.0134647	0.0219985	0.012219	0.0114304	0.0125572	0.0138985	0.018067	0.0116003	0.00614646	0.0109772	0.0159839	0.0115574	0.0099978	0.00372734	0.0115192	0.00887048
F17W0	1.6861	0.0171667	0.175769	0.0485342	0.101664	0.0843849	0.050611	0.0512332	0.039202	0.0577974	0.000371264	0.029119	0.0119981	0.0427486	0.0324679	0.0461644	0.0449653	0.0482132	0.0376508	0.035749	0.0268735	0.0303101	0.000275481	0.00234805	0.0236548	0.0208495	0.0281304	0.0315585	0.02098	0.0183858	0.00396975	0.0116019	0.0181101	0.00973873	0.0221535	0.014642	0.012388	0.0144323	0.0145558	0.0189602	0.0144426	0.00533318	0.003005	0.0111454	0.00859497	0.0130589	0.00892054	0.0113301	0.00846199
F17W1	0.658627	0.0421138	0.135712	0.267197	0.102455	0.0693676	0.0617586	0.0951915	0.0381654	0.0442568	0.00173591	0.0215281	0.00436917	0.034862	0.0408386	0.0309501	0.0144234	0.0234739	0.0345386	0.0263751	0.0202834	0.0321594	0.00010241	0.00316152	0.0266179	0.0184098	0.0127177	0.0263881	0.0178818	0.0312618	0.00587109	0.0123455	0.0145601	0.0115408	0.0209308	0.0152348	0.015154	0.0148495	0.0110707	0.0125804	0.0116956	0.00521653	0.0175486	0.0137644	0.00697904	0.0133744	0.00828209	0.00957181	0.00768186
F17W12	0.956594	0.0461809	0.189699	0.354061	0.115056	0.0726201	0.0500576	0.0738979	0.111329	0.0380626	0.00211616	0.0371767	0.0716216	0.0340769	0.0394135	0.048794	0.0295259	0.0298069	0.0337799	0.0441101	0.0253949	0.023316	0.000165799	0.00452582	0.0332886	0.0179856	0.0200055	0.0287211	0.0226137	0.0195713	0.016191	0.0161652	0.0177469	0.0156628	0.0209984	0.0153276	0.0212454	0.02449	0.00876045	0.0111848	0.0137347	0.0102026	0.0211079	0.0191047	0.0111111	0.0103175	0.014897	0.0113673	0.00811146
F17W4	0.955125	0.0159419	0.197198	0.151923	0.0939981	0.0926142	0.0574707	0.115288	0.0789446	0.0439096	0.000473342	0.0452895	0.103635	0.0299137	0.0504338	0.0274602	0.0141403	0.026246	0.0401975	0.0208422	0.02861	0.0173915	2.31713e-06	0.0019643	0.0193592	0.0194371	0.0290666	0.0317633	0.0216473	0.0214446	0.396584	0.0182358	0.018399	0.0151024	0.025083	0.0134858	0.015391	0.0093342	0.0119972	0.0153313	0.0117668	0.00714339	0.00887114	0.00702579	0.0129157	0.00609322	0.0108665	0.00900159	0.0139359
F18W0	1.41374	0.0206751	0.168741	0.00464354	0.107463	0.095817	0.0621068	0.0778955	0.0174932	0.0684199	0.000586365	0.0243952	0.00411564	0.0324422	0.0503016	0.0306966	0.0406587	0.0287907	0.0419307	0.0245856	0.0299374	0.0252613	0.000557435	0.00281022	0.0157812	0.0242237	0.0241803	0.0340352	0.0212554	0.00838556	0.00743983	0.00910174	0.0185526	0.00889139	0.0218737	0.0161025	0.0118215	0.0114992	0.0154335	0.0148837	0.0122063	0.00803153	6.31247e-05	0.00859712	0.00745396	0.011422	0.00464823	0.0104647	0.005474
F18W1	1.30857	0.0282831	0.146752	0.278532	0.094153	0.0663308	0.0590509	0.130969	0.0506452	0.0247914	0.00156285	0.0266436	0.0153997	0.0273904	0.0579805	0.0346586	0.0303332	0.0178473	0.0308074	0.0296985	0.0203286	0.0237357	2.4457e-06	0.00302908	0.0219213	0.0187616	0.014556	0.0241227	0.017556	0.0122007	0.0104363	0.00951015	0.0131922	0.0135398	0.0174629	0.0123559	0.0128899	0.0214993	0.00936215	0.0102808	0.0111161	0.00609533	0.0176194	0.0142354	0.00779595	0.0101337	0.00995511	0.0138962	0.00667753
F18W4	1.07902	0.021419	0.16598	0.0461069	0.10015	0.0753888	0.0489224	0.149869	0.02534	0.0328832	0.000920428	0.0256059	0.0109953	0.034694	0.0699414	0.0391352	0.0278906	0.0258788	0.0334896	0.0330312	0.0238404	0.0277923	2.8691e-06	0.00300007	0.0253542	0.0211876	0.0191749	0.0260058	0.0202898	0.0119492	0.100222	0.00873764	0.0150775	0.027876	0.0188111	0.0145948	0.0143009	0.0225123	0.0112293	0.0157568	0.013044	0.00722381	0.00246917	0.014186	0.00753084	0.0116285	0.00888083	0.0104803	0.00739683
F19W0	2.03006	0.00846822	0.216962	0.0335788	0.0844284	0.101058	0.133495	0.00996171	0.0394022	0.0409284	0.000132021	0.041027	0.00273668	0.0441306	0.0274445	0.0292215	0.0447538	0.0324323	0.0442511	0.0229217	0.0333676	0.0206695	0.00120917	0.00199649	0.0153735	0.02341	0.0331969	0.0379803	0.0225797	0.0130464	0.00774874	0.0132284	0.0212014	0.0167687	0.027027	0.0156746	0.0126423	0.011342	0.0212933	0.0140289	0.0163063	0.00777082	0.00128202	0.00575971	0.0124856	0.00928386	0.00313571	0.00879598	0.0084986
F19W1	1.67821	0.010637	0.218218	0.00557196	0.101279	0.0971476	0.0633169	0.0710904	0.0266704	0.038816	0.000455606	0.0402656	0.00693511	0.0357442	0.0350051	0.0333569	0.0292313	0.029832	0.0409139	0.0264723	0.0309506	0.0223644	2.75828e-06	0.00229286	0.0156897	0.0201344	0.035025	0.0326532	0.0224258	0.00853776	0.0108015	0.0132559	0.0186526	0.0151169	0.0218885	0.0152717	0.00224041	0.0127093	0.0171942	0.0159719	0.0138461	0.00699933	9.15151e-05	0.00861322	0.0118113	0.00888589	0.00441042	0.0101301	0.00695884
F19W12	1.93709	0.129573	0.267647	0.0281039	0.121619	0.122432	0.105782	0.0750346	0.0239247	0.0438079	0.0083002	0.0384727	0.00399053	0.0384304	0.0323672	0.0292621	0.0254085	0.03028	0.0359388	0.0281431	0.0293903	0.0205384	0.000172856	0.0107536	0.0207263	0.0213483	0.0369112	0.0317046	0.026267	0.0123494	0.00785181	0.00802887	0.0171559	0.0123578	0.0222045	0.0127715	0.0146739	0.0154535	0.0151128	0.0224845	0.0100254	0.00754471	0.00131875	0.0105537	0.0111879	0.00809328	0.00457478	0.00510878	0.00772772
F19W4	1.91277	0.00580733	0.276336	0.00387774	0.100263	0.106972	0.0623423	0.0853649	0.0138317	0.0557858	2.85466e-06	0.0526714	0.00270023	0.0323976	0.0400159	0.0562414	0.0336731	0.0295536	0.0438701	0.0287109	0.0319055	0.0191629	0.000173088	0.00227017	0.0145909	0.0193801	0.0257777	0.0328143	0.0270403	0.00389067	0.0054261	0.0133947	0.0198438	0.0126817	0.0248359	0.01368	0.0139651	0.0153265	0.0135276	0.018432	0.0138851	0.00584106	1.38032e-05	0.00688081	0.0163835	0.00762932	0.00493826	0.0123484	0.00779808
F20W0	1.72718	0.0215736	0.257868	0.00736629	0.0980474	0.0980418	0.121761	0.0516865	0.0314734	0.0713898	0.000521982	0.0329389	0.0140418	0.0442818	0.0246712	0.0203121	0.0472308	0.0365631	0.0365387	0.0122589	0.0332235	0.0292284	0.69795	0.00280029	0.0166376	0.0219398	0.0234704	0.0290604	0.0235334	0.00795882	0.0100717	0.0125335	0.0172877	0.0148779	0.0218668	0.0156023	0.0101073	0.00747808	0.010451	0.0243867	0.0126631	0.0117001	0.000165558	0.00636295	0.00947385	0.011511	0.00508296	0.0138913	0.00840666
F20W1	1.5063	0.0164484	0.210822	0.120461	0.0826686	0.0936108	0.0481796	0.049038	0.0305342	0.0374524	0.00066077	0.0294696	0.017581	0.0248478	0.021888	0.0288868	0.0364043	0.0278338	0.0324373	0.0231565	0.0234861	0.0253187	2.35133e-06	0.00206488	0.0240999	0.0197569	0.0209716	0.0272122	0.0223384	0.0204864	0.0154853	0.00882769	0.0144262	0.0151329	0.0203825	0.0135265	0.0106241	0.010645	0.00955544	0.0189913	0.00969777	0.0063991	0.00679896	0.00714653	0.00860875	0.0101097	0.00428521	0.0105931	0.00898421
F20W12	1.78629	0.0194297	0.284659	0.59724	0.122077	0.100804	0.110612	0.0911944	0.0396484	0.051544	0.000757815	0.0517245	0.0442436	0.0346148	0.0410566	0.0269086	0.0484099	0.0285213	0.0358423	0.00465864	0.028762	0.017717	2.90172e-06	0.00317975	0.0236215	0.0245152	0.0370809	0.0288495	0.0217558	0.0200402	0.00575014	0.00951928	0.0166098	0.0130585	0.0210748	0.0139432	0.0130031	0.0158608	0.011107	0.0198759	0.0124566	0.00688131	0.0393489	0.0104226	0.0155592	0.00723423	0.00638236	0.0118075	0.0113204
F20W4	1.91394	0.018149	0.19766	0.181322	0.103305	0.0938355	0.0893329	0.0713832	0.0665103	0.0565838	0.000600269	0.0572382	0.0246222	0.030531	0.0342835	0.0333891	0.0283607	0.027216	0.0351229	0.0284918	0.00847325	0.0207493	0.000266639	0.00318026	0.0270251	0.0183675	0.0248286	0.0283208	0.0209274	0.030534	0.00616326	0.00955356	0.0168909	0.00122315	0.0206962	0.013223	0.0108211	0.0139215	0.0120914	0.0175993	0.0125414	0.00711372	0.0118719	0.00748607	0.0172088	0.00779839	0.00526407	0.0151346	0.0124165
F21W0	1.20843	0.0163651	0.225229	0.0485029	0.0983607	0.124974	0.0647212	0.0487074	0.0704609	0.0665363	0.000501591	0.0330137	0.0169773	0.039083	0.0194574	0.0311407	0.0458253	0.0338035	0.0478389	0.0256073	0.0383668	0.0112344	0.000544519	0.00199731	0.0169172	0.0225598	0.0229258	0.0377217	0.0229806	0.00893773	0.0113361	0.0175708	0.0215977	0.0119323	0.0270579	0.0161515	0.0411295	0.0116873	0.0173543	0.0206039	0.0143892	0.00626408	0.00263497	0.00832482	0.0104284	0.00417339	0.00627115	0.0118517	0.0112984
F21W1	1.61474	0.0188739	0.210695	0.21227	0.0864109	0.0946078	0.0579114	0.0187842	0.0676568	0.0349188	0.000698921	0.0156648	0.015316	0.0323978	0.0124299	0.0276162	0.0190776	0.030335	0.0390037	0.0225189	0.0288573	0.0266642	0.000443701	0.00157511	0.0297066	0.0216523	0.0236231	0.0290902	0.0194857	0.0365128	0.0046933	0.0104734	0.0148813	0.0149302	0.0235311	0.0124631	0.014265	0.00933468	0.0145398	0.0145568	0.00932617	0.00481394	0.0134441	0.00658943	0.00485847	0.0106581	0.00215015	0.0113094	0.00799989
F21W12	1.67102	0.0205699	0.203126	0.255965	0.0829926	0.088182	0.0480195	0.0351372	0.0412131	0.0485418	0.000823539	0.0184503	0.0131221	0.0351204	0.0141697	0.0298495	0.0264245	0.0268084	0.0314984	0.0263288	0.0269105	0.0323153	0.000423489	0.00273599	0.0243154	0.0195525	0.0331476	0.0282088	0.0210136	0.0183388	0.0149802	0.0125259	0.0161967	0.0162505	0.0196927	0.0137922	0.0136119	0.0130771	0.0121782	0.0160356	0.011245	0.00562623	0.0155956	0.00814862	0.00520833	0.012572	0.00379999	0.00959204	0.00891273
F21W4	1.34653	0.0213252	0.23555	0.225848	0.082343	0.0893096	0.0617103	0.0373115	0.0399852	0.0627651	0.000843237	0.0164326	0.0889966	0.0329903	0.016015	0.0305893	0.0158556	0.0252572	0.0330574	0.018335	0.0265855	0.0303303	0.000142778	0.00201199	0.0214484	0.0185715	0.0293202	0.0251028	0.0204161	0.020734	0.011048	0.0144832	0.0147673	0.0217794	0.0189115	0.01308	0.0116904	0.0104545	0.0148497	0.0136298	0.00986956	0.0072618	0.0144079	0.00624687	0.00461146	0.0123139	0.00296988	0.00751198	0.00645772
[truncated: 135 more columns]
